1  
2  
3  
4  
5  
6  
7  
8  
9  
10  
11  
12  
13  
14  
15  
16  
17  
18  
19  
20  
21  
22  
23  
24  
25  
26  
27  
28  
29  
30  
31  
32  
33  
34  
35  
36  
37  
38  
39  
40  
41  
42

## **An adipocyte light-Op sin 3 pathway regulates the circadian clock and energy balance**

Shruti Vemaraju<sup>1,2#</sup>, Gowri Nayak<sup>1,2#</sup>, Ethan D. Buhr<sup>8#</sup>, Yoshinobu Odaka<sup>1,2</sup>, Kevin X. Zhang<sup>1,2</sup>, Julie A Mocko<sup>1,2</sup>, April N. Smith<sup>1,2</sup>, Brian A. Upton<sup>1,2</sup>, Jesse J. Zhan<sup>1,2</sup>, Vishnupriya J. Borra<sup>3</sup>, Elise Bernhard<sup>3</sup>, Kazutoshi Murakami<sup>3</sup>, Minh-Thanh Nguyen<sup>1,2</sup>, Shannon A. Gordon<sup>8</sup>, Gang Wu<sup>1,6</sup>, Robert Schmidt<sup>1</sup>, Xue Mei<sup>1,6</sup>, Nathan T. Petts<sup>5</sup>, Matthew Batie<sup>5</sup>, Sujata Rao<sup>11</sup>, John B. Hogenesch<sup>1,6</sup>, Takahisa Nakamura<sup>3,4\*</sup>, Russell N. Van Gelder<sup>8,9,10\*</sup>, and Richard A. Lang<sup>1,2,3\*</sup>

<sup>1</sup>Center for Chronobiology, <sup>2</sup>The Visual Systems Group, Abrahamson Pediatric Eye Institute, Division of Pediatric Ophthalmology, <sup>3</sup>Division of Developmental Biology, <sup>4</sup>Division of Endocrinology, <sup>5</sup>Division of Clinical Engineering, <sup>6</sup>Division of Human Genetics, Cincinnati Children's Hospital Medical Center, Cincinnati, OH 45229, USA

<sup>7</sup>Department of Ophthalmology, University of Cincinnati, College of Medicine, Cincinnati, OH 45229, USA

Departments of <sup>8</sup>Ophthalmology, <sup>9</sup>Biological Structure, <sup>10</sup>Pathology, University of Washington Medical School, Seattle, WA 98104, USA

<sup>11</sup>The Cleveland Clinic, Ophthalmic Research, 9500 Euclid Avenue, OH 44195, USA

# equal contribution. \*Corresponding authors:

**Richard A. Lang**, Division of Pediatric Ophthalmology, Cincinnati Children's Hospital Medical Center, 3333 Burnet Avenue, Cincinnati, OH 45229, Tel: 513 636-2700 (Office), 513 803-2230 (Assistant), Fax: 513-636-4317. Email: Richard.Lang@cchmc.org

**Russell N. Van Gelder**, Department of Ophthalmology, University of Washington Medical School, Seattle, WA 98104, USA. Tel: 206 543-7250, Fax: 206 685-7055, Email: russvg@u.washington.edu

**Takahisa Nakamura**, Division of Endocrinology, Cincinnati Children's Hospital Medical Center, 3333 Burnet Avenue, Cincinnati, OH 45229, Tel: 513 803-9230. Email: takahisa.nakamura@cchmc.org

### **Author contributions**

SV, GN, EB: Experimental design and analysis, manuscript preparation. ANS, JZ, JAM, KXZ, BAU, YO, VB, EB, KM, M-TN, SAG, GW, RS, XM, SR: Experimental execution and analysis. NTP, MB: Electronic device design and construction. JBH: Supervision of bioinformatics analysis. TN, RNVG, RAL: Project leadership, experimental design and manuscript preparation.

43  
44 **Almost all life forms can detect and decode light information for adaptive advantage.**  
45 **Examples include the visual system, where photoreceptor signals are processed into**  
46 **virtual images, and the circadian system, where light entrains a physiological clock. Here**  
47 **we describe a pathway in mice that employs encephalopsin (OPN3, a 480 nm light**  
48 **responsive opsin) to mediate light responses in murine adipocytes. The adipocyte light-**  
49 **OPN3 pathway regulates neonatal growth in mice and is required for at least three**  
50 **important functions including (1) photoentrainment of a local circadian clock, (2)**  
51 **extracellular matrix deposition, and (3) regulation of mitochondrial content and the**  
52 **proportion of “brite” adipocytes. Furthermore, we show that the light-OPN3 pathway is**  
53 **required for normal levels of uncoupling protein 1 (UCP1) in white and brown adipose**  
54 **tissue. Consequently, neonatal *Opn3* germ-line and adipocyte-conditional null mice show**  
55 **a reduced ability to maintain their body temperature under cold stress. This was also**  
56 **observed in wild-type mice deprived of blue light. We hypothesize that the adipocyte**  
57 **light-OPN3 pathway provides a dynamically responsive, circadian clock-integrated**  
58 **mechanism for regulating adipocyte function and in turn directing metabolism to**  
59 **thermogenesis rather than anabolism. These data indicate an important role for**  
60 **peripheral light sensing in mammals and may have broad implications for human health**  
61 **given the unnatural lighting conditions in which we live.**

62  
63 During breeding of mice homozygous for the *Opn3*<sup>lacz</sup> null allele (Fig. S1a), we noted a growth  
64 differential in neonates. Assessment of body weight from the day of birth (P1) to P15 revealed  
65 that *Opn3*<sup>lacz/lacz</sup> homozygotes grew larger than control littermates (Fig. 1a, b). Homozygotes  
66 were, on average, 1.3 gm heavier than controls at P15 (Fig. 1a). Crown-to-rump measurements  
67 indicated that *Opn3* null mice were also longer than normal (Fig. 1a, inset chart). At P23, the  
68 size difference was obvious (Fig. 1b). Over many litters, the average increase in weight for  
69 neonatal *Opn3*<sup>lacz/lacz</sup> mice was 9.1% (Fig. 1c).

70 OPN3 has the conserved amino acids that qualify it as a ciliary opsin<sup>1,2</sup>. Vertebrate  
71 OPN3 also forms a functional photopigment when expressed *in vitro*<sup>3,4</sup>. However, it remained  
72 possible that the large size of mutant mice had little to do with the light sensing function of  
73 OPN3. To assess this we raised C57BL/6J mice (that are generally smaller than the mixed  
74 background mice shown in Fig. 1a) in normal 12L:12D lighting (12 hr light, 12 hr dark) that either  
75 included or excluded the blue, 480 nm centered wavelengths that stimulate OPN3<sup>3</sup>. This  
76 showed that “minus blue” resulted in elevated mouse weight (Fig. 1d) and length (Fig. 1d, inset  
77 chart), providing a phenocopy of OPN3 loss. Since melanopsin (OPN4) also absorbs in the 480  
78 nm band, we assessed *Opn4* null mice but did not detect a neonatal overgrowth (Fig. S1).  
79 Combined, these data raised the interesting possibility that an OPN3-dependent light response  
80 normally influences neonatal growth in a mammal.

81 *Opn3* is expressed in adipose tissue in mice<sup>5</sup> and humans<sup>6</sup> (Fig. S2g, h) raising the  
82 possibility that OPN3 activity in adipocytes could explain the neonatal growth phenotype. We  
83 performed conditional deletion of a *loxP*-flanked *Opn3* allele (*Opn3*<sup>fl</sup>, Fig. S1) with the adipocyte-  
84 specific *Adipoq-cre*<sup>7</sup>. Assessment of body weight and crown-to-rump length (Fig. 1e) showed  
85 that *Adipoq-cre; Opn3*<sup>fl/fl</sup> mice were larger than normal (Fig. 1f), mimicking the phenotype of the  
86 *Opn3* germ-line null and selective loss of blue light. Over many litters, the average increase in  
87 weight of neonatal *Adipoq-cre; Opn3*<sup>fl/fl</sup> mice was 9.1% (Fig. 1g) identical to that observed for  
88 the germ-line null (Fig. 1c). Thus, conditional deletion identified adipocytes as a key site of

89 OPN3 function.

90 There are many different adipose tissue depots in mice and three different types of  
91 adipocytes (white, brown and “brite” or “beige”<sup>8</sup>). No reliable antibodies for murine OPN3 are  
92 presently available. To determine the expression pattern of *Opn3* in adipocytes we took  
93 advantage of the *Opn3<sup>lacz</sup>* allele (Fig. S1). The interscapular adipose tissue (iAT) depot  
94 comprises interscapular subcutaneous white adipose tissue (iscWAT) and interscapular brown  
95 adipose tissue (iBAT). Xgal labelling of cryosections from P16 iAT showed no background  
96 labelling in control (Fig. 2a) but intense labelling in the *Opn3<sup>lacz/lacz</sup>* iscWAT (Fig. 2b). In iBAT,  
97 Xgal labelled cells were not readily apparent at low magnification (Fig. 2b) but at higher  
98 magnification and bright transillumination, a subset of expressing brown adipocytes was  
99 detected (Fig. 2d). Labelled cells were not present in control iBAT (Fig. 2c). P16 inguinal WAT  
100 (inWAT) from control mice was Xgal negative (Fig. 2e). Unlike in the adult, P16 inWAT has a  
101 high content of “brite” adipocytes (Fig. 2e, f, BrAd). These do not appear to be Xgal labelled in  
102 *Opn3<sup>lacz/lacz</sup>* mice. By contrast, large, unilocular adipocytes from *Opn3<sup>lacz/lacz</sup>* mice were Xgal  
103 positive (Fig. 2e-h). For confirmation of this *Opn3* expression pattern, we used the *Opn3<sup>cre</sup>* allele  
104 (Fig. S1) to convert the tdTomato reporter *Ai14* (Fig. 2i-k). Cryosections showed that in iAT,  
105 almost all adipocytes within the iscWAT were positive (Fig. 2i, k). In iBAT, a subset of brown  
106 adipocytes was positive (Fig. 2j, k). Finally, we also used an *Opn3-eGFP* reporter that is based  
107 on a bacterial artificial chromosome transgene (GENSAT #030727-UCD). In an assessment of  
108 inWAT, iscWAT and iBAT, this reporter confirmed expression of *Opn3* in the majority of white  
109 adipocytes and a subset of brown adipocytes in iBAT (Fig. S2). Finally, the GTEx database  
110 showed that in human subcutaneous and omental adipose tissue, OPN3 was expressed at low-  
111 to-middling levels of 2.9 and 3.1 tags per million, respectively (Fig. S2). These data indicate that  
112 human adipose tissues express OPN3.

113 A major function for ‘non-visual’ opsins is the light entrainment of circadian clocks; both  
114 melanopsin (OPN4) and neuropsin (OPN5) function in this capacity<sup>9,10,11,12</sup>. To determine if  
115 OPN3 influenced the circadian clock, we first analyzed adipose tissue for circadian rhythmicity  
116 by monitoring bioluminescence from tissue explanted from PER2::LUC mice<sup>13,14</sup>. iscWAT and  
117 inWAT from wild-type mice showed clear rhythmicity *ex vivo* (Fig 3a-c). In contrast, the same  
118 tissues from *Opn3*-null mice showed markedly reduced circadian amplitude (Fig 3a, b, red  
119 traces, c, similar to that previously described in *Opn3*-null retina<sup>12</sup>). Furthermore, *in vivo* qPCR  
120 assessment of the transcripts for clock genes *Per1-3*, *Bmal1*, *Npas2*, *Nr1d1/2* and *Rora* in  
121 control *Opn3<sup>fl/fl</sup>* and experimental *Opn3<sup>fl/fl</sup>; Adipoq-cre* mice at two different circadian time-points  
122 (ZT1 and ZT17, Fig. 3d) showed significant down-regulation of *Per1-3* at ZT1 and of *Per2*, *Per3*,  
123 *Npas2*, and *Nr1d1/2* at ZT17. This is consistent with the reduced amplitude of PER2::LUC  
124 rhythm in acute *ex vivo* assessment (Fig. 3a-c) and suggests that OPN3 function affects the  
125 adipose circadian clock *in vivo*.

126 To determine if OPN3 might be functioning in a phototransduction pathway in this tissue,  
127 we assessed whether the circadian clock of adipose tissue could be photoentrained *in vitro* in a  
128 manner similar to retina and cornea<sup>12</sup>. Photoentrainment assays monitor the real-time oscillation  
129 of the clock gene reporter PER2::LUC<sup>13</sup> after a period of four days in which the tissue is  
130 exposed to an LD cycle<sup>11</sup>. Opposing phases for two explants that experience LD versus DL  
131 indicates photoentrainment and light responsiveness<sup>11</sup>. Wild-type retinal tissue showed clear  
132 photoentrainment in this assay (Fig. 3e). Tissues that experience LD versus DL and do not  
133 photoentrain (like pituitary, Fig. 3f) show coincident PER2::LUC phases. While iscWAT  
134 PER2::LUC oscillations were not detectable after six days in culture, inWAT from *Per2::Luc*

135 mice showed low amplitude oscillations that demonstrated clearly opposing phases and thus  
136 light-dependent clock entrainment (Fig. 3g). Conversely, inWAT from *Opn3* null *Per2::Luc* mice  
137 showed coincident phases (Fig. 3h) indicating that OPN3 is required for light-dependent clock  
138 entrainment in adipose tissue. Plotting the average PER2::LUC peak from multiple inWAT  
139 photoentrainment assays (Fig. 3i) confirms that OPN3 is required for photoentrainment of  
140 inWAT. These results indicate that OPN3 is intimately involved in both free-running  
141 maintenance and light-responsiveness of the circadian oscillator in adipose tissue.

142 To further address the function of OPN3, we performed a microarray-based  
143 transcriptome analysis on P16 control and *Opn3* germ-line null mice. Tissues for this analysis  
144 were harvested on P16 at ZT1. The control and *Opn3* null mice used in this experiment showed  
145 no significant weight difference. This choice was designed to minimize the identification of  
146 pathways secondary to *Opn3* loss-of-function. We harvested two tissues (iAT and inWAT) that  
147 express *Opn3* and one, liver, that does not. Using the AltAnalyze suite<sup>15,16</sup>, we identified  
148 differentially regulated transcripts that fell into functional clusters and pathways. Clustering  
149 based on significant Z-scores for WikiPathway models is noted (Fig. S3a-c) but this information  
150 is also developed into a more detailed overall schematic (Fig. S3d-h). In addition, subsets of this  
151 schematic and additional *Opn3*-dependent transcriptome changes are shown in Figs. 4-6. In  
152 these schematics, each box represents a transcript where red and blue colour coding indicates  
153 up- or down-regulation, respectively. With a few noted exceptions, all *Opn3*-dependent  
154 transcript regulation is significant to  $p < 0.05$ . The *Opn3* transcript showed the highest negative  
155 fold change in *Opn3* null iAT (3.0 fold down,  $p = 1.5 \times 10^{-4}$ ) and inWAT (5.6 fold down,  $p = 7.6 \times 10^{-3}$ )  
156 but was not significantly changed in liver where expression levels are very low. Changes in  
157 some transcripts of interest were validated by qPCR (Fig. S4). Overall, transcriptome analysis  
158 indicated that OPN3 activity was required for normal regulation of metabolism, as evidence by  
159 deregulation of lipid, glucose and energy generation pathways. Consistent with a role for OPN3  
160 in regulating adipose circadian clocks, we detected one clock gene, *Npas2*, that was  
161 significantly changed in iAT (Fig. S3, S4a).

162 Transcriptome analysis for both iAT and inWAT revealed remarkable clusters of  
163 upregulated extracellular matrix (ECM) transcripts, their integrin receptors and ECM remodelling  
164 enzymes (Fig. 4a, b, S4a). For iAT, most of the clustered ECM components are collagens (Fig.  
165 4a), whereas for inWAT (Fig. 4b), there is variety including fibrillins, a fibronectin, a laminin as  
166 well as *Col14a1* and *Thrombospondin 3*, the only two regulated transcripts in common with the  
167 iAT ECM cluster. Immunodetection of Collagen 6 in iAT and inWAT from *Opn3* adipocyte  
168 conditional null mice at P16 (Fig. 4c and d, square) revealed a robust up-regulation in both iBAT  
169 (Fig. 4e-h) and inWAT (Fig. 4i-l). This validates transcriptome data but because this is an  
170 adipocyte conditional deletion, also shows that *Opn3* has a crucial adipocyte-specific function.  
171 In *Opn3* germ-line null mice at P16, an up-regulation of ECM was not obvious by  
172 immunofluorescence, perhaps because for each individual transcript, up-regulation was modest  
173 (1.1-1.3 fold). However, when we assessed *Opn3* germ-line null mice at 7 months of age, we  
174 observed a robust up-regulation of COL6 in both iBAT (Fig. 4m-p) and inWAT (Fig. 4q-t). This  
175 suggests that in germ-line *Opn3* null mice, there may be a more subtle, progressive  
176 accumulation of COL6, perhaps due to non-adipocyte functions of OPN3. It is known that the  
177 ECM of adipocytes, and in particular Collagen 6<sup>17</sup>, is crucial for normal metabolic function<sup>18,19,20</sup>.  
178 Adipose tissue fibrosis, a marked accumulation of ECM components, is also associated with  
179 metabolic disruption<sup>17</sup>.



180 The ECM clusters in iAT and inWAT include many transcripts that normally show  
181 circadian rhythmicity in expression level according to the CircaDB database<sup>21</sup>. Remarkably, 7 of  
182 9 ECM transcripts in iAT show rhythmic expression (Fig. 4a). These data are also consistent  
183 with findings from circadian clock mutant mice. For example, *Clock* mutant mice show a very  
184 similar ECM transcript clustering in cardiomyocytes<sup>22</sup>. This reinforces the suggestion that one  
185 function of OPN3 is to regulate the adipose circadian clock.

186 In inWAT, *Opn3*-dependent, differentially regulated transcripts cluster within the PPAR  
187 pathway (Fig. 5a). This pathway regulates adipocyte size as well as lipid metabolism and  
188 energy generation<sup>23,24</sup>. Many PPAR pathway genes are regulated by the circadian clock<sup>23</sup> and  
189 consistent with this and *Opn3*-dependent adipose entrainment (Fig. 3), 9 of 12 regulated PPAR  
190 pathway transcripts show rhythmic expression in adipose tissue according to the CircaDB  
191 database<sup>21</sup>. An assessment of adipocyte size in inWAT of *Opn3* germ-line and adipocyte  
192 conditional null mice at P16 (Fig. 5c, d) revealed that both showed significantly elevated  
193 adipocyte size. Neonatal WAT is a mixture of white and “brite” adipocytes and normally has a  
194 significantly higher proportion of “brite” adipocytes than adult WAT depots<sup>25,26</sup>. Hematoxylin  
195 staining of inWAT sections showed that both the *Opn3* germ line (Fig. 5e, f) and adipocyte  
196 conditional nulls (Fig. 5g, h) have a lower proportion of the smaller, “brite” adipocytes, as would  
197 be suggested by adipocyte size assessment.

198 Consistent with this, inWAT from the *Opn3* null showed a striking cluster of 17 electron  
199 transport chain (ETC) transcripts, all of which were down-regulated (Fig. 5b). Confirming a lower  
200 mitochondrial content, the ETC components COX4 (Fig 5k, l) and UCP1 (Fig. 5m, n) were both  
201 detected at a lower level by immunofluorescence in P16 *Opn3* null inWAT compared with the  
202 control. In whole inWAT sections, UCP1 immunofluorescence was widespread in the control,  
203 and more restricted in the *Opn3* null (Fig. 5m, n). Low levels of UCP1 in P16 *Opn3* null inWAT  
204 were confirmed by immunoblotting (Fig. 5o).

205 We have shown that, like *Opn3* loss-of-function, “minus blue” lighting causes neonatal  
206 mice to overgrow (Fig. 1). To determine whether this phenocopy extended to tissue changes  
207 observed in the *Opn3* null, we performed hematoxylin staining of histological sections and found  
208 the lower “brite” adipocyte content (Fig. 5i, j) characteristic of both the *Opn3* germ line and  
209 conditional nulls. Finally, we assessed inWAT from *Opn3* null and “minus blue” reared mice at  
210 P16 for total NAD content as this essential coenzyme mediator of electron transport provides a  
211 measure of mitochondrial content and function<sup>27</sup>. This quantification showed that in neither case  
212 was there a change in liver NAD (Fig. 5p). However, in both the *Opn3* null and “minus blue”  
213 reared mice, NAD levels in inWAT were low (Fig. 5p). Combined, these data indicate that a  
214 neonatal light-OPN3 pathway influences the “beigeness” and mitochondrial function of inWAT.

215 Prompted by the effects of *Opn3* deficiency on mitochondria in inWAT and a modest  
216 cluster of ETC genes in iAT (Fig. 6a), we assessed mitochondrial status in P16 iBAT using  
217 immunoblot for ETC components and transmission electron microscopy (TEM). Immunoblotting  
218 for the ETC components ATP5A (Complex V), COX1 (Complex IV), SDHB (Complex II),  
219 NDUFB8 (Complex I) and UCP1 revealed some variability in the presence of SDHB in the *Opn3*  
220 null but a consistently low level of both NDUFB8 and UCP1 (Fig. 6b). An immunoblot of P16  
221 mice raised in “minus blue” lighting revealed that similarly, NDUFB8 and UCP1 were at lower  
222 than normal levels (Fig. 6c). At P28, mitochondrial morphology in *Opn3* null iBAT was often  
223 abnormal with a disorganized pattern of cristae (Fig. 6d). Transcriptome analysis clustering also  
224 revealed that four TRP (Transient receptor potential cation channels) family genes were  
225 regulated and that Leptin, an adipokine, was 1.9 fold reduced (Fig. 6a). The latter was validated

226 by the low Leptin levels detected in serum of *Opn3* null mice (Fig. S4).

227 Many features of the *Opn3* germ-line and adipocyte conditional null mice suggested  
228 there might be a defect in thermogenesis. UCP1, found at a lower than normal level in both  
229 inWAT and iAT of neonatal *Opn3* null mice, has a central role in the thermogenesis response of  
230 mice. Furthermore, *Opn3* null mice show low “brite” adipocyte content in inWAT and abnormal  
231 mitochondrial morphology in iAT. In neonatal mice, *Leptin*, found at low levels in *Opn3* null mice,  
232 is required for establishing the thermogenesis circuit<sup>28</sup>. The TRP channels that cluster in  
233 transcriptome analysis of the *Opn3* null, function as thermosensors<sup>29</sup>. There are also strong  
234 links between the circadian clock and thermogenesis. When *Bmal1* is conditionally deleted from  
235 adipocytes, transcripts for *Ucp1* and *Pparg* upregulate, mitochondrial density is increased and  
236 core body temperature is elevated<sup>30</sup>. By contrast, *Per2* null mice under cold stress show  
237 reduced transcript levels for *Ucp1* and *Fabp3* (both regulated in the *Opn3* transcriptome  
238 analysis, Fig. 5a, b) and are cold sensitive<sup>31</sup>. Finally, NR1D1 (Rev-Erb $\alpha$ ) directly regulates *Ucp1*  
239 expression in iBAT and *Nr1d1* mutant mice show improved cold tolerance<sup>32</sup>. These data  
240 suggest the hypothesis that *Opn3*, through its regulation of the adipocyte clock, may also  
241 regulate thermogenesis.

242 To test this, we performed cold-stress assays on both neonatal and adult mice that were  
243 *Opn3* germ line null, adipocyte conditional null, or were raised in “minus blue” conditions. The  
244 core body temperature of P21 control and experimental mice within these cohorts was  
245 unchanged prior to the cold stress (Fig. 6e). Cold stress assays were performed in lighting  
246 conditions that were either “full spectrum” (380 nm, 480 nm and 630 nm) or “minus blue” (380  
247 nm and 630 nm) as a means of assessing whether any changes in thermoregulation were light-  
248 dependent. When *Opn3*<sup>+/+</sup> and *Opn3*<sup>lacz/lacz</sup> mice were exposed to 4°C over the course of three  
249 hours under “minus blue” lighting conditions, the core body temperature response curves were  
250 indistinguishable (Fig. 6f). However, when the same cohorts were assessed a second time  
251 under full spectrum lighting, control, *Opn3*<sup>+/+</sup> mice were able to defend their body temperature  
252 much more effectively than *Opn3*<sup>lacz/lacz</sup> mice (Fig. 6g). Importantly, because the “minus blue”  
253 control and the *Opn3* null mice show a thermogenesis response that is indistinguishable (Fig.  
254 6f), OPN3 function can fully explain the effect of blue light on thermogenesis.

255 To determine whether neonatal development of the thermogenesis response could be  
256 influenced by light, we raised cohorts of C57BL/6J mice from birth in a normal LD cycle of full  
257 spectrum or “minus blue” lighting. These were the same conditions used to assess wavelength-  
258 dependent neonatal growth (Fig. 1d) and indeed, the “minus blue” reared mice were larger than  
259 full spectrum controls at P21 (control, 6.69±0.13 gm, “minus blue” reared, 8.35±0.31 gm,  
260 p=0.0007). Despite their elevated body weight, “minus blue” reared mice were less able to  
261 defend their body temperature when exposed to a cold stress in full spectrum light (Fig. 6h).  
262 This establishes that postnatal development of the thermogenesis response in mice is,  
263 surprisingly, dependent on the wavelength of photons to which they are exposed. The  
264 correspondence of the thermogenesis defect with that observed in the *Opn3* null, coupled with  
265 data indicating that 480 nm light activates OPN3<sup>3</sup>, suggests that development of a normal  
266 thermoregulatory circuit is dependent on a light-OPN3 pathway.

267 To assess whether the defective thermosensory response of the *Opn3* null mice could  
268 be attributed to adipocyte OPN3, we repeated the cold stress analysis using cohorts of control  
269 *Opn3*<sup>fl/fl</sup> and *Adipoq-cre; Opn3*<sup>fl/fl</sup> mice. In full spectrum lighting, *Adipoq-cre; Opn3*<sup>fl/fl</sup> mice  
270 showed a more limited ability than *Opn3*<sup>fl/fl</sup> control mice to defend their body temperature (Fig.  
271 6i). When mice were switched to “minus blue” lighting at 180 minutes of the cold stress

272 experiment, the body temperature of *Opn3<sup>fl/fl</sup>* rapidly changed to the lower body temperature of  
273 the conditional null (Fig. 6i). This analysis shows that thermoregulation in neonatal mice is  
274 dependent on an adipocyte light-OPN3 pathway that is active both developmentally and acutely.  
275 Repetition of cold-stress experiments in adult *Opn3* germ line and adipocyte conditional null  
276 mice showed a very similar thermosensory deficit (Fig. 6j-m) in which the absence of blue light,  
277 either throughout the cold stress (Fig. 6j, l), or acutely at minute 180 (Fig. 6k, m) could mimic the  
278 effect of *Opn3* mutation. These data indicate that adult mice also use an adipocyte light-OPN3  
279 pathway to regulate the use of energy to maintain body temperature.

280 The analysis presented has assessed the function of Opsin 3<sup>1,3</sup> (encephalopsin) in the  
281 mouse. We show that adipocytes use OPN3 as a light detector in a pathway that regulates  
282 photoentrainment of the adipose circadian clock, the composition of adipocyte ECM, the  
283 thermosensory response, and growth of neonatal mice. Extraocular photoreception has been  
284 described in vertebrates including fish<sup>33,34</sup> and birds<sup>35</sup> but there are few examples in  
285 mammals<sup>36,37</sup>. The current analysis adds OPN3 to the short list of atypical opsins that act in  
286 photoentrainment of circadian clocks. Melanopsin (OPN4) activity can entrain the central  
287 circadian clock in the suprachiasmatic nucleus (SCN)<sup>38,10,9</sup>. A second circadian clock system  
288 was discovered recently when it was shown that neuropsin (OPN5) is necessary and sufficient  
289 for photoentrainment in a retinal circadian clock that functions independently of the OPN4-SCN  
290 clock<sup>11,12</sup>. We hypothesize that the OPN3-adipocyte clock represents a third example of a non-  
291 visual, opsin-mediated entrainment system, and the first shown to function outside the eye.

292 A role for the light-OPN3 pathway in regulation of the thermosensory response is likely  
293 linked to its role in circadian clock photoentrainment. This is suggested by the many examples  
294 of clock gene mutant mice that have thermoregulation deficits and, like the *Opn3* null, show  
295 changes in the complement of mitochondrial proteins, such as UCP1, that are required for heat  
296 generation<sup>30,31,32</sup>. In some cases it has been shown that genes involved in the thermoregulatory  
297 response are direct targets of circadian clock transcription factors<sup>32</sup>. The current analysis  
298 indicates that the light-OPN3 pathway is required for development of the thermosensory  
299 response<sup>28</sup>. We have shown the light-OPN3 pathway regulates *Leptin*, an adipokine implicated  
300 in this aspect of development. Thus, Leptin regulation may explain, at least in part, the action of  
301 the light-OPN3 pathway in establishing core body temperature regulation. Since some clock  
302 genes can be acutely light-induced, it is also possible that acute modulation of the  
303 thermosensory response occurs via acutely regulated clock machinery. We hypothesize that the  
304 adipocyte light-OPN3 pathway provides a dynamically responsive, circadian clock-integrated  
305 mechanism for matching energy availability to the light-dark cycle.

306 The adipocyte-specific, OPN3-dependent regulation of heat production also provides an  
307 explanation for the overgrowth phenotype observed in the *Opn3* germ line and conditional  
308 mutant mice. The generation of heat in endotherms is an adaptation for the efficient function of  
309 the biochemical processes that constitute normal physiology. In neonatal *Opn3* mutants, we  
310 suggest that energy not expended to elevate body temperature can be redirected to the  
311 anabolic pathways that underlie growth. Though it might seem that reduced body temperature,  
312 and reduced efficiency of anabolism would result in reduced growth, it is likely that under normal  
313 conditions, *Opn3* neonatal mice maintain their body temperature by huddling with the dam and  
314 their littermates. It has been documented that individual new-born rodents with reduced heat  
315 production capacity can acquire heat energy from the dam and from littermates<sup>39</sup>. The absence  
316 of a significant core body temperature change in *Opn3* mutant mice under ambient conditions

317 further suggests that only when *Opn3* mutant mice are isolated and cold-stressed is the heat  
318 generation abnormality observable.

319 In sum, we have found that blue light significantly regulates neonatal growth and  
320 metabolism in mice. Unexpectedly, we find this effect is mediated by direct photoreception in  
321 adipose tissue, via an 'orphan' opsin, OPN3. Direct photosensitivity of isolated adipose tissue is  
322 demonstrated by its ability to synchronize its circadian clock to light-dark cycles, a phenomenon  
323 which requires OPN3 function. Loss of OPN3 results in alteration of numerous metabolic  
324 pathways, including modified cellular composition of fat, reduced NAD levels, and defective  
325 thermogenesis under cold challenge. While all these effects are light-dependent, it remains  
326 possible that OPN3 also has light-independent basal functions. Further, it is not yet clear which  
327 OPN3 effects are primary; does disruption of the circadian clock cause the observed metabolic  
328 changes, or does altered adipocyte metabolism negatively impact the clock? Or, are both  
329 involved in a more complicated feedback loop? Further study of clock mutant mice under  
330 similar physiologic conditions may help resolve these questions.

331 OPN3 is highly conserved across species and is expressed in human adipocytes. If the  
332 light-OPN3 adipocyte pathway exists in humans, there are potentially broad implications for  
333 human health. Our modern lifestyle subjects us to unnatural lighting spectra, exposure to light at  
334 night, shift work and jet-lag, all of which result in metabolic disruption<sup>40,41 42,43</sup>. Recent studies  
335 have suggested that light exposure directly affects metabolic function in humans<sup>44</sup>. Based on  
336 the current findings, it is quite likely that insufficient or arrhythmic stimulation of the light-OPN3  
337 adipocyte pathway is part of an explanation for the prevalence of metabolic deregulation in the  
338 industrialized nations where unnatural lighting patterns have become the norm.

339

## 340 References

341

- 342 1. Blackshaw, S. & Snyder, S. H. Encephalopsin: a novel mammalian extraretinal opsin  
343 discretely localized in the brain. *J Neurosci* **19**, 3681–3690 (1999).
- 344 2. Arendt, D. Ciliary Photoreceptors with a Vertebrate-Type Opsin in an Invertebrate Brain.  
345 *Science (80-. )*. **306**, 869–871 (2004).
- 346 3. Koyanagi, M., Takada, E., Nagata, T., Tsukamoto, H. & Terakita, A. Homologs of  
347 vertebrate *Opn3* potentially serve as a light sensor in nonphotoreceptive tissue. *Proc Natl*  
348 *Acad Sci U S A* **110**, 4998–5003 (2013).
- 349 4. Sugihara, T., Nagata, T., Mason, B., Koyanagi, M. & Terakita, A. Absorption  
350 characteristics of vertebrate non-visual opsin, *Opn3*. *PLoS One* **11**, (2016).
- 351 5. Regard, J. B., Sato, I. T. & Coughlin, S. R. Anatomical Profiling of G Protein-Coupled  
352 Receptor Expression. *Cell* **135**, 561–571 (2008).
- 353 6. Hardy, O. T. *et al.* Body mass index-independent inflammation in omental adipose tissue  
354 associated with insulin resistance in morbid obesity. *Surg. Obes. Relat. Dis.* **7**, 60–7  
355 (2011).
- 356 7. Eguchi, J. *et al.* Transcriptional control of adipose lipid handling by IRF4. *Cell Metab* **13**,  
357 249–259 (2011).
- 358 8. Rosenwald, M., Perdikari, A., Rüllicke, T. & Wolfrum, C. Bi-directional interconversion of  
359 brite and white adipocytes. *Nat. Cell Biol.* **15**, 659–67 (2013).
- 360 9. Berson, D. M., Dunn, F. A. & Takao, M. Phototransduction By Retinal Ganglion Cells That  
361 Set The Circadian Clock. *Science (80-. )*. **295**, 1070–1073 (2002).
- 362 10. Hattar, S., Liao, H. W., Takao, M., Berson, D. M. & Yau, K. W. Melanopsin-containing  
363 retinal ganglion cells: architecture, projections, and intrinsic photosensitivity. *Science (80-*  
364 *. )*. **295**, 1065–1070 (2002).
- 365 11. Buhr, E. D. & Van Gelder, R. N. Local photic entrainment of the retinal circadian oscillator



- 366 in the absence of rods, cones, and melanopsin. *Proc Natl Acad Sci U S A* **111**, 8625–  
367 8630 (2014).
- 368 12. Buhr, E. D. *et al.* Neuropsin (OPN5)-mediated photoentrainment of local circadian  
369 oscillators in mammalian retina and cornea. *Proc Natl Acad Sci U S A* **112**, 13093–13098  
370 (2015).
- 371 13. Yoo, S. H. *et al.* PERIOD2::LUCIFERASE real-time reporting of circadian dynamics  
372 reveals persistent circadian oscillations in mouse peripheral tissues. *Proc Natl Acad Sci U*  
373 *S A* **101**, 5339–5346 (2004).
- 374 14. Izumo, M. *et al.* Differential effects of light and feeding on circadian organization of  
375 peripheral clocks in a forebrain Bmal1 mutant. *Elife* **3**, (2014).
- 376 15. Salomonis, N. AltAnalyze - An optimized platform for RNA-seq splicing and domain-level  
377 analyses. in *Proceedings - 2012 IEEE 2nd Conference on Healthcare Informatics,*  
378 *Imaging and Systems Biology, HISB 2012* 113 (2012). doi:10.1109/HISB.2012.38
- 379 16. Emig, D. *et al.* AltAnalyze and DomainGraph: Analyzing and visualizing exon expression  
380 data. *Nucleic Acids Res.* **38**, (2010).
- 381 17. Khan, T. *et al.* Metabolic dysregulation and adipose tissue fibrosis: role of collagen VI.  
382 *Mol. Cell. Biol.* **29**, 1575–1591 (2009).
- 383 18. Spencer, M. *et al.* Adipose tissue extracellular matrix and vascular abnormalities in  
384 obesity and insulin resistance. *J. Clin. Endocrinol. Metab.* **96**, E1990-8 (2011).
- 385 19. Divoux, A. & Clément, K. Architecture and the extracellular matrix: The still unappreciated  
386 components of the adipose tissue. *Obes. Rev.* **12**, (2011).
- 387 20. Mariman, E. C. M. & Wang, P. Adipocyte extracellular matrix composition, dynamics and  
388 role in obesity. *Cell. Mol. Life Sci.* **67**, 1277–1292 (2010).
- 389 21. Pizarro, A., Hayer, K., Lahens, N. F. & Hogenesch, J. B. CircaDB: a database of  
390 mammalian circadian gene expression profiles. *Nucleic Acids Res* **41**, D1009-13 (2013).
- 391 22. Bray, M. S. *et al.* Disruption of the circadian clock within the cardiomyocyte influences  
392 myocardial contractile function, metabolism, and gene expression. *Am. J. Physiol. Heart*  
393 *Circ. Physiol.* **294**, 1036–1047 (2008).
- 394 23. Liu, C., Li, S., Liu, T., Borjigin, J. & Lin, J. D. Transcriptional coactivator PGC-1 $\alpha$   
395 integrates the mammalian clock and energy metabolism. *Nature* **447**, 477–481 (2007).
- 396 24. Fan, W. & Evans, R. PPARs and ERRs: Molecular mediators of mitochondrial  
397 metabolism. *Current Opinion in Cell Biology* **33**, 49–54 (2015).
- 398 25. Wu, J. *et al.* Beige adipocytes are a distinct type of thermogenic fat cell in mouse and  
399 human. *Cell* **150**, 366–376 (2012).
- 400 26. Cousin, B. *et al.* Occurrence of brown adipocytes in rat white adipose tissue: molecular  
401 and morphological characterization. *J. Cell Sci.* **103**, 931–942 (1992).
- 402 27. Peek, C. B. *et al.* Circadian clock NAD<sup>+</sup> cycle drives mitochondrial oxidative metabolism  
403 in mice. *Science (80- )*. **342**, (2013).
- 404 28. Zeltser, L. M. Developmental influences on circuits programming susceptibility to obesity.  
405 *Frontiers in Neuroendocrinology* **39**, 17–27 (2015).
- 406 29. Vriens, J., Nilius, B. & Voets, T. Peripheral thermosensation in mammals. *Nature*  
407 *Reviews Neuroscience* **15**, 573–589 (2014).
- 408 30. Nam, D. *et al.* The adipocyte clock controls brown adipogenesis via TGF-beta/BMP  
409 signaling pathway. *J Cell Sci* (2015). doi:10.1242/jcs.167643
- 410 31. Chappuis, S. *et al.* Role of the circadian clock gene Per2 in adaptation to cold  
411 temperature. *Mol Metab* **2**, 184–193 (2013).
- 412 32. Gerhart-Hines, Z. *et al.* The nuclear receptor Rev-erbalpha controls circadian  
413 thermogenic plasticity. *Nature* **503**, 410–413 (2013).
- 414 33. Kojima, D. & Fukada, Y. Non-visual photoreception by a variety of vertebrate opsins.  
415 *Novartis Found Symp* **224**, 265–282 (1999).
- 416 34. Sato, K. *et al.* Two UV-sensitive photoreceptor proteins, Opn5m and Opn5m2 in ray-  
417 finned fish with distinct molecular properties and broad distribution in the retina and brain.  
418 *PLoS One* **11**, (2016).



- 419 35. Nakane, Y. *et al.* A mammalian neural tissue opsin (Opsin 5) is a deep brain  
420 photoreceptor in birds. *Proc. Natl. Acad. Sci.* **107**, 15264–15268 (2010).
- 421 36. Sikka, G., Hori, D., Pandey, D., Barreto, S. & Berkowitz, D. Opsin 3 and 4 mediate light-  
422 dependent vasorelaxation: Therapeutic targets in pulmonary hypertension. *Crit. Care*  
423 *Med.* **44**, 138 (2016).
- 424 37. Sikka, G. *et al.* Melanopsin mediates light-dependent relaxation in blood vessels. *Proc.*  
425 *Natl. Acad. Sci.* **111**, 17977–17982 (2014).
- 426 38. Stetson, M. H. & Watson-Whitmyre, M. Nucleus suprachiasmaticus: the biological clock in  
427 the hamster? *Science* **191**, 197–9 (1976).
- 428 39. Haig, D. Huddling: Brown Fat, Genomic Imprinting and the Warm Inner Glow. *Current*  
429 *Biology* **18**, (2008).
- 430 40. Fonken, L. K. & Nelson, R. J. The effects of light at night on circadian clocks and  
431 metabolism. *Endocrine Reviews* **35**, 648–670 (2014).
- 432 41. Opperhuizen, A. L. *et al.* Light at night acutely impairs glucose tolerance in a time-,  
433 intensity- and wavelength-dependent manner in rats. *Diabetologia* 1–11 (2017).  
434 doi:10.1007/s00125-017-4262-y
- 435 42. Fonken, L. K., Aubrecht, T. G., Meléndez-Fernández, O. H., Weil, Z. M. & Nelson, R. J.  
436 Dim Light at Night Disrupts Molecular Circadian Rhythms and Increases Body Weight. *J.*  
437 *Biol. Rhythms* **28**, 262–271 (2013).
- 438 43. Laermans, J. & Depoortere, I. Chronobesity: Role of the circadian system in the obesity  
439 epidemic. *Obes. Rev.* **17**, 108–125 (2016).
- 440 44. Cheung, I. N. *et al.* Morning and Evening Blue-Enriched Light Exposure Alters Metabolic  
441 Function in Normal Weight Adults. *PLoS One* **11**, (2016).  
442  
443

444  
445  
446

## Figures and Legends

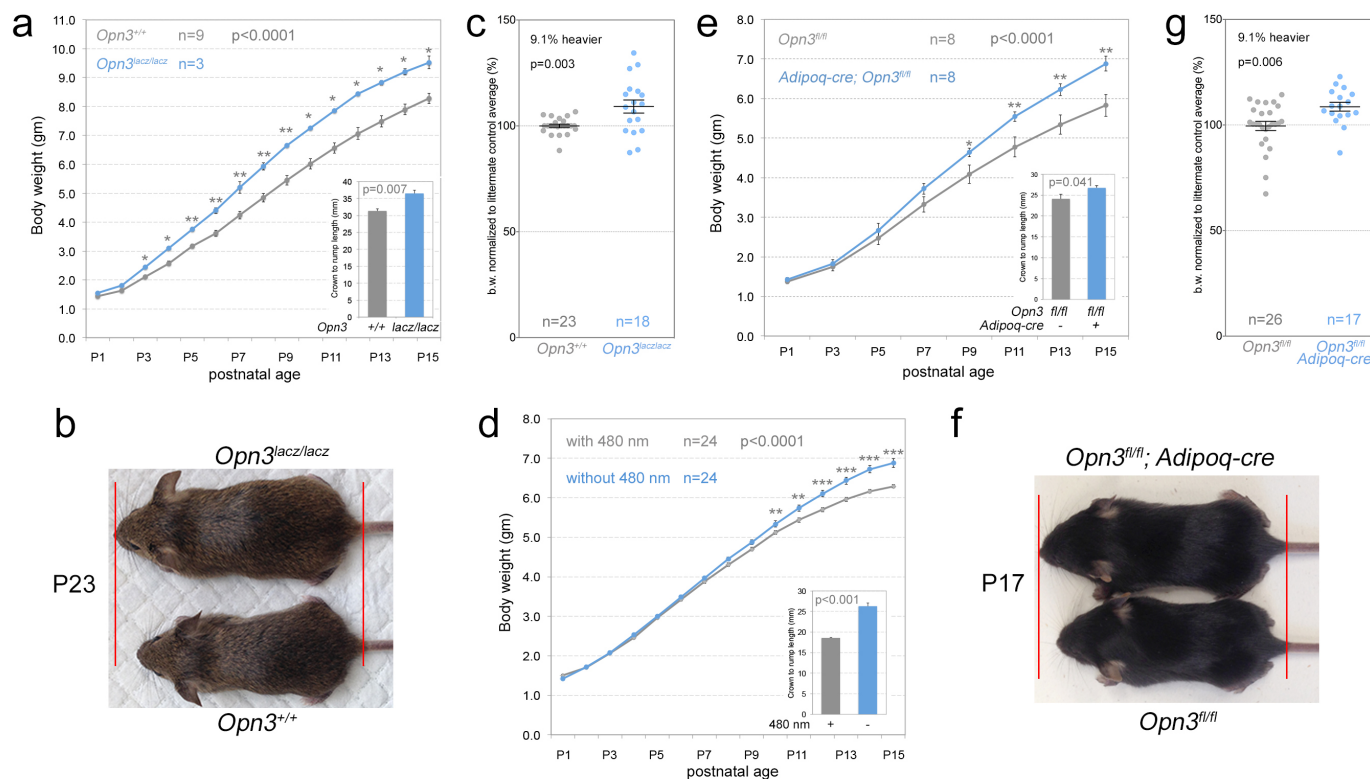

447  
448  
449  
450  
451  
452  
453  
454  
455  
456  
457  
458  
459  
460  
461  
462  
463  
464  
465

### Figure 1. *Opn3* and light-dependent regulation of neonatal growth

(a) P1-P15 growth chart for *Opn3<sup>lacz/lacz</sup>* null and wild-type mice showing that the null mice are larger according to weight. Chart inset shows crown-to-rump length at P15. (b) *Opn3<sup>lacz/lacz</sup>* versus WT mouse size at P23. (c) Scatter plot showing *Opn3<sup>lacz/lacz</sup>* null mouse weight at P16 as a proportion of wild-type controls. They are on average, 9.1% heavier. (d) P1-P15 growth chart for C57BL/6 mice raised from birth with and without 480 nm centred light ( $\lambda_{max}$  for OPN3) showing that the absence of 480 nm light results in larger mice according to weight. Chart inset shows crown-to-rump length at P15. (e) P1-15 growth chart for control *Opn3<sup>fl/fl</sup>* and *Adipoq-cre; Opn3<sup>fl/fl</sup>* mice. Conditional null mice are larger than normal. Chart inset shows crown-to-rump length at P15. (f) *Opn3<sup>fl/fl</sup>* versus *Adipoq-cre; Opn3<sup>fl/fl</sup>* mouse size at P17. (g) Scatter plot showing *Adipoq-cre; Opn3<sup>fl/fl</sup>* conditional null mouse weight at P16 as a proportion of wild-type controls. They are on average, 9.1% heavier. All data in this figure are presented as mean  $\pm$  s.e.m. n is sample size. Statistical significance for growth time-courses (a, e, d) was assessed by two-way ANOVA and p-value indicated on top of chart. All single time-point comparisons were performed with *t*-test \*,  $P < 0.05$ , \*\*,  $P < 0.01$ , \*\*\* $P < 0.001$ . In these data, no sex differences were apparent.

466

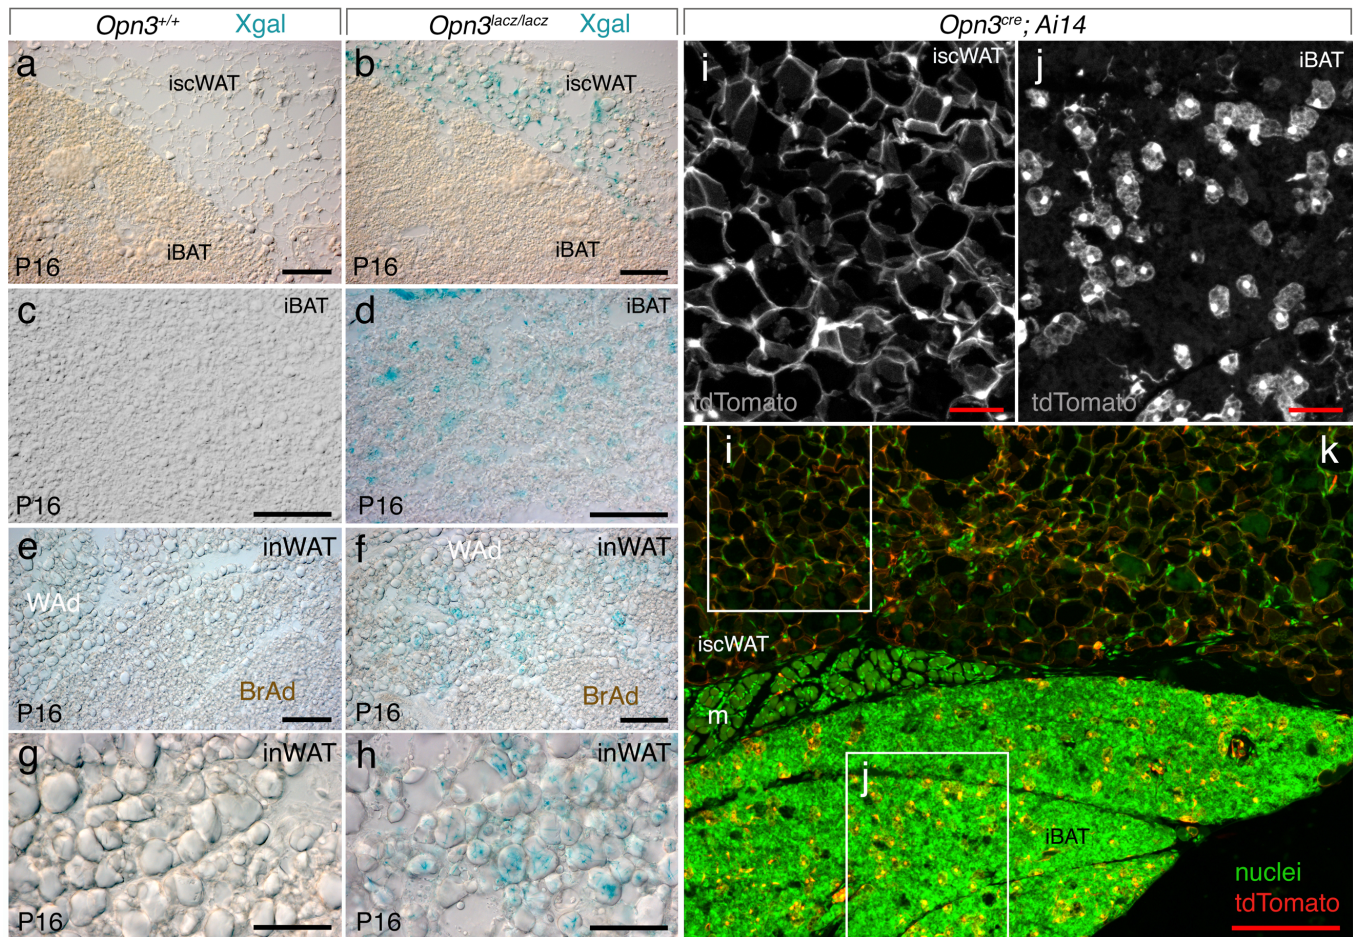

467

468 **Figure 2. Expression of *Opn3* in iAT and inWAT**

469 (a-d) Xgal labelled wild type (a, c) and *Opn3<sup>lacz/lacz</sup>* (b, d) cryosections of interscapular adipose  
470 tissue (iAT) including interscapular subcutaneous white adipose tissue (a, b, iscWAT) and  
471 interscapular brown adipose tissue (a-d, iBAT) at P16. (e-h) Xgal labelled wild type (e, g) and  
472 *Opn3<sup>lacz/lacz</sup>* (f, h) cryosections of inguinal white adipose tissue including white (WAd) and "brite"  
473 (BrAd) adipocytes. (i-k) Detection of tdTomato (red, greyscale) in *Opn3<sup>cre</sup>; Ai14* mice for iAT  
474 showing positive cells in iscWAT (i) and iBAT (j). iscWAT and iBAT are separated by a leaflet of  
475 muscle (m) that is visible in some sections. Labelling of nuclei with Hoechst33258 is presented  
476 in green. In (a,b,e,f,k) scale bars are 100 μm. In (c,d,g,h,i,j) scale bars are 50 μm.

477

478



479

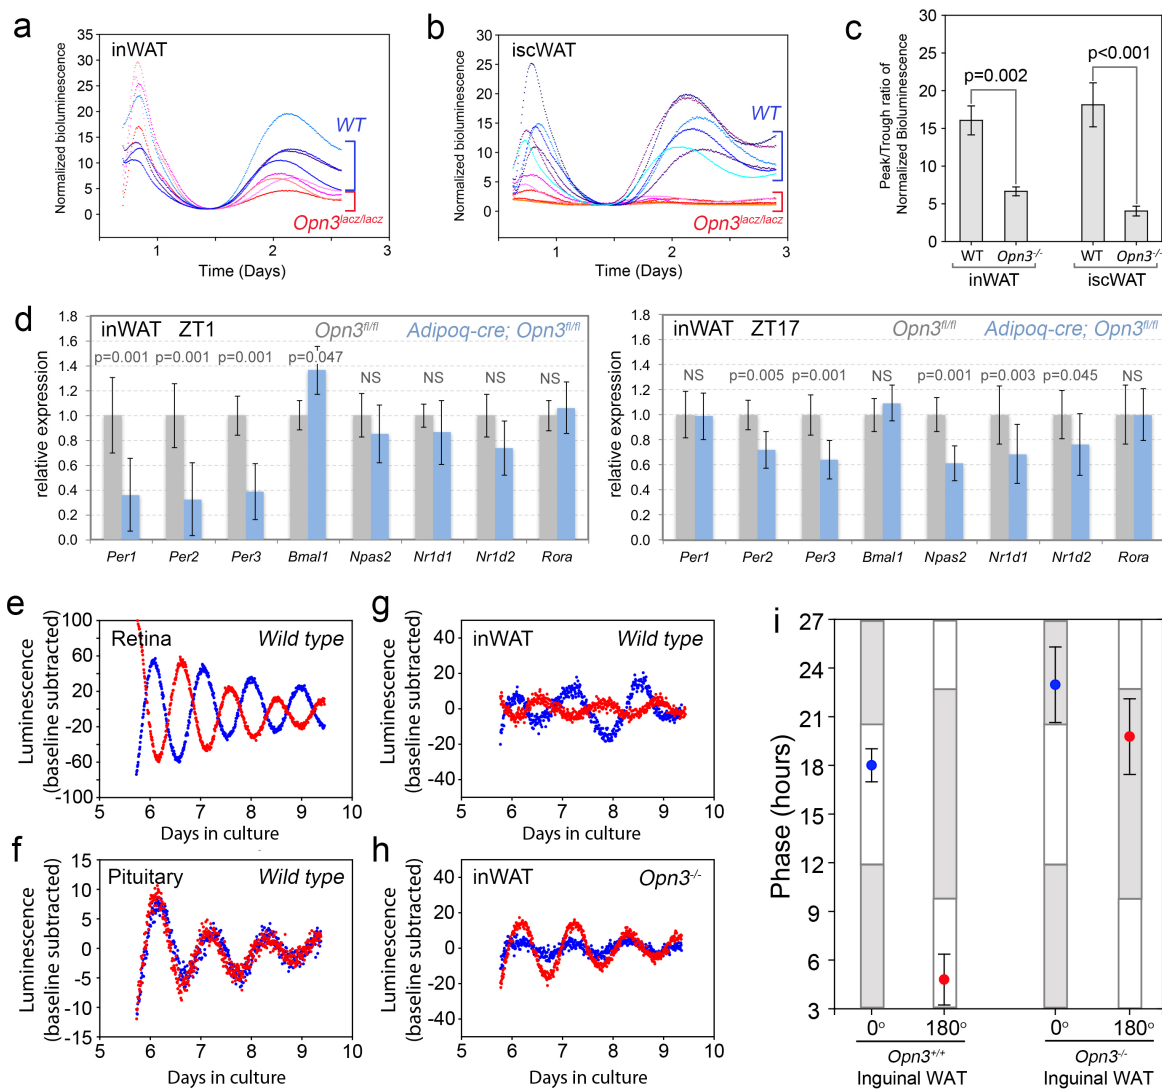

480 **Figure 3. *Opn3* is required for light-dependent circadian clock function in WAT**  
 481 (a, b) PER2::LUC circadian clock reporter oscillations in inWAT (a) and iscWAT (b) immediately  
 482 after explant. In both tissues, clock oscillation in the *Opn3* null shows low amplitude as indicated  
 483 by the peak-trough ratio (c). (a-c) n=6 for each genotype and tissue. Comparison between  
 484 genotypes in c were performed with Mann-Whitney Rank Sum test and p-value indicated on  
 485 chart. (d) qPCR analysis for circadian clock genes *Per1-3*, *Bmal1*, *Npas2*, *Nr1d1/2*, and *Rora* in  
 486 inguinal WAT of *Opn3<sup>fl/fl</sup>* and *Opn3<sup>fl/fl</sup>; Adipoq-cre* mice at P16 for ZT1 (left) and ZT17 (right). The  
 487 expression level of many clock genes is reduced. n=3 for each genotype and time-point.  
 488 Statistical significance calculated using fixed pairwise randomization reallocation test. (e)  
 489 Representative traces from photoentrainment assay for retina showing PER2::LUC  
 490 luminescence readout for samples exposed to LD versus DL. (f) as in (e) but for pituitary. Retina  
 491 photoentrains, pituitary does not. (g) Opposing phases of PER2::LUC readout from inWAT  
 492 indicates photoentrainment. (h) Loss of opposing PER2::LUC phases in *Opn3* null inWAT  
 493 photoentrainment. (i) Aggregation of phase data for control (n=6) and *Opn3* null (n=5) inWAT  
 494 photoentrainment assays indicating a requirement for *Opn3*. Data are presented as mean  $\pm$   
 495 s.e.m.  
 496

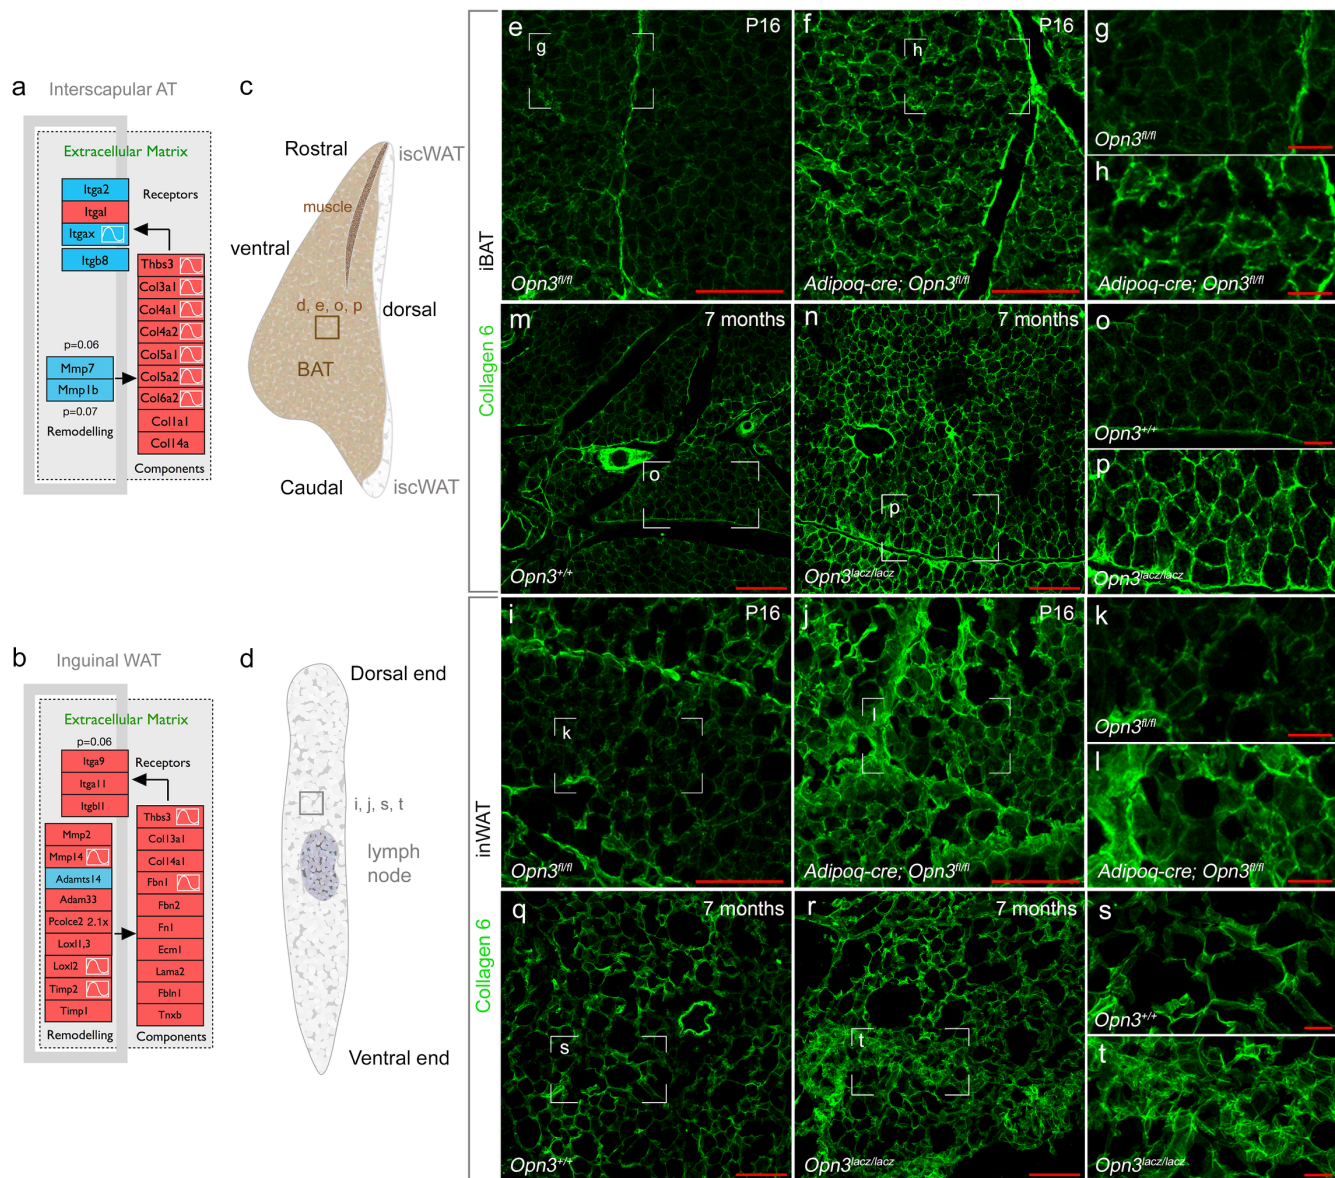

497 **Figure 4. *Opn3* null mouse iAT and inWAT extracellular matrix deregulation**  
 498 (a, b) Schematic of clustered *Opn3*-dependent transcript changes in ECM signalling pathways  
 499 for iAT (a) and inWAT (b). Red and blue colour coding indicates up- and down-regulated  
 500 transcripts, respectively. The sine-wave symbol indicates that, according to data within CircaDB,  
 501 expression of this transcript is diurnally rhythmic in this tissue type. Schematics are modified  
 502 versions of Wikipathway models for the Focal Adhesion-PI3K-mTOR Signaling pathway  
 503 (WP2841). (c, d) Diagrams indicating the regions of iAT and inWAT cryosections in which images  
 504 for (e-t) were generated. (e-t) Labelling for Collagen 6 (COL6) at P16 in control and *Opn3<sup>fl/fl</sup>*;  
 505 *Adipoq-cre* mice (e-h, iBAT and i-l, inWAT) and at 7 months in control and *Opn3<sup>lacz/lacz</sup>* germ-line  
 506 null mice (m-p, iBAT and q-t, inWAT). (g,h,k,l,o,p,s,t) are magnified versions of the regions  
 507 indicated. Scale bars in red, 100  $\mu$ m (e,f,m,n,i,j,q,r), 25  $\mu$ m (g,h,o,p,k,l,s,t).  
 508  
 509



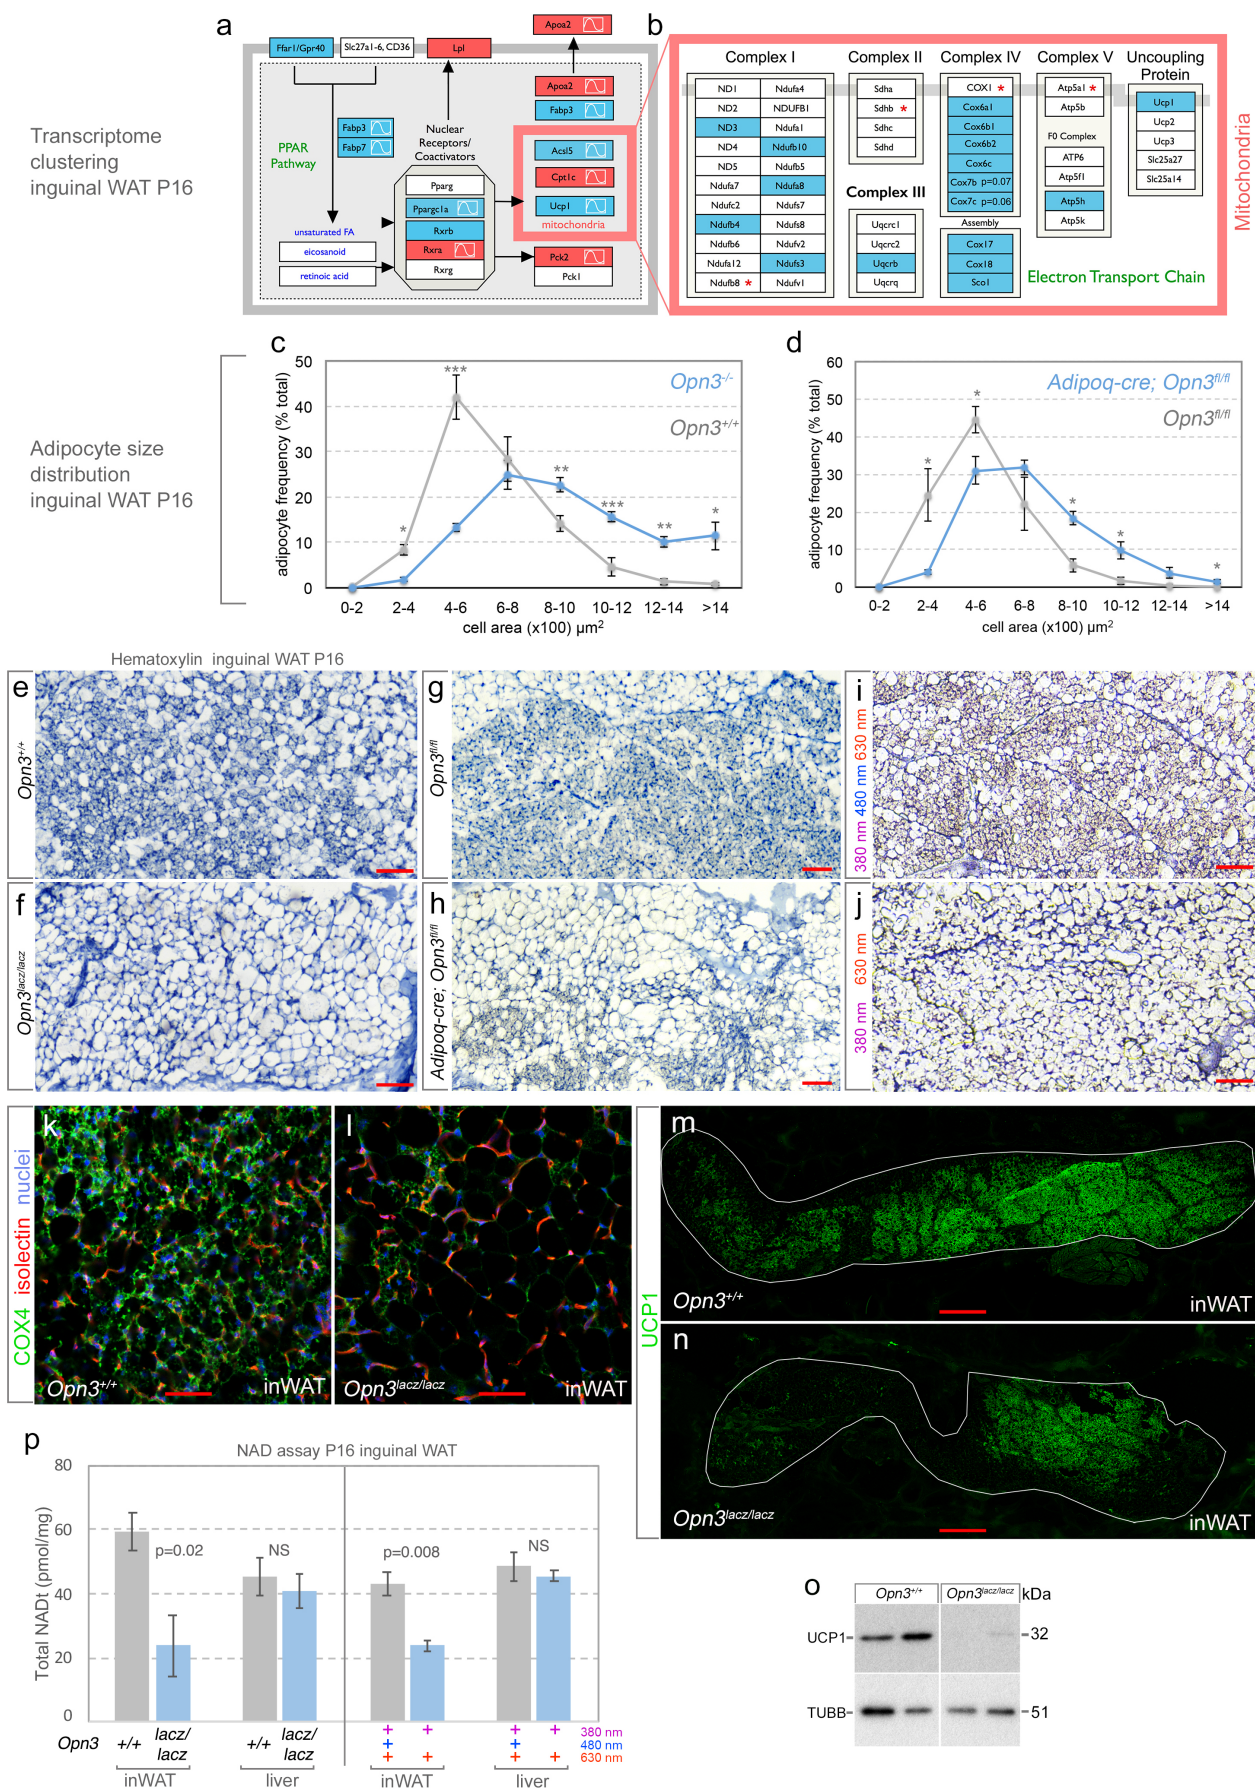

511 **Figure 5. *Opn3* null and "minus blue" reared mouse inWAT phenotype**

512 (a, b) Schematic of clustered *Opn3*-dependent transcript changes in the PPAR pathway (a) and  
513 in the electron transport chain of mitochondria (b). Red and blue colour coding indicates up- and  
514 down-regulated transcripts, respectively. The sine-wave symbol indicates that, according to data  
515 within CircaDB, expression of this transcript is diurnally rhythmic in this tissue type. Schematics  
516 are modified versions of Wikipathway models for PPAR Signaling Pathway (WP2316, (a)), and  
517 for the electron Transport Chain (WP295, (b)). (c, d) Adipocyte size distribution in inWAT  
518 comparing control and *Opn3<sup>lacz/lacz</sup>* (c) as well as control *Opn3<sup>fl/fl</sup>* and *Adipoq-cre; Opn3<sup>fl/fl</sup>* (d) at  
519 P16. Data are presented as mean  $\pm$  s.e.m. n=3 for each genotype. Direct comparisons between  
520 genotypes at each interval were performed with Student's T-test \* $P < 0.05$ , \*\* $P < 0.01$ ,  
521 \*\*\* $P < 0.001$ . (e-j) Hematoxylin staining of histological sections of P16 inWAT from *Opn3<sup>+/+</sup>* (e),  
522 *Opn3<sup>lacz/lacz</sup>* (f), *Opn3<sup>fl/fl</sup>* (g), *Adipoq-cre; Opn3<sup>fl/fl</sup>* (h), full spectrum (380 nm, 480 nm, 630 nm)  
523 reared (i), and "minus blue" (380 nm, 630 nm) reared (j) mice. In (f, h, j) diminished numbers of  
524 "brite" adipocytes and larger average cell size is apparent. (k, l) Labelling for the electron  
525 transport chain marker COX4 (green) in P16 control and *Opn3* null mice. Both reduced COX4  
526 labelling and larger adipocyte size is apparent in the *Opn3<sup>lacz/lacz</sup>* tissue. Counter-labelling is  
527 isolectin for vasculature (red) and Hoechst33258 for nuclei (blue). (m, n) UCP1 (green) labelling  
528 of inWAT in control (m) and *Opn3<sup>lacz/lacz</sup>* (n) germ-line null animals at P16. Boundary of inWAT is  
529 outlined in white. (o) Immunoblot detecting UCP1 and  $\beta$ -tubulin (TUBB) in P16 inguinal WAT  
530 from *Opn3<sup>+/+</sup>* and *Opn3<sup>lacz/lacz</sup>* mice. UCP1 levels are low in the *Opn3* null tissue. (p) Total NAD  
531 levels in inguinal WAT and liver for P16 *Opn3<sup>+/+</sup>* and *Opn3<sup>lacz/lacz</sup>* mice (left chart, n=4) or for  
532 mice reared either in "full spectrum" or "minus blue" lighting (right chart, n=3). p values  
533 calculated using Student's T-test. In both the *Opn3* null and "minus blue" conditions, NAD level  
534 are low in inWAT. Scale bars in red (e, f, i, j, k, l) 50  $\mu$ m, (g, h) 100  $\mu$ m (m, n) 500  $\mu$ m.  
535

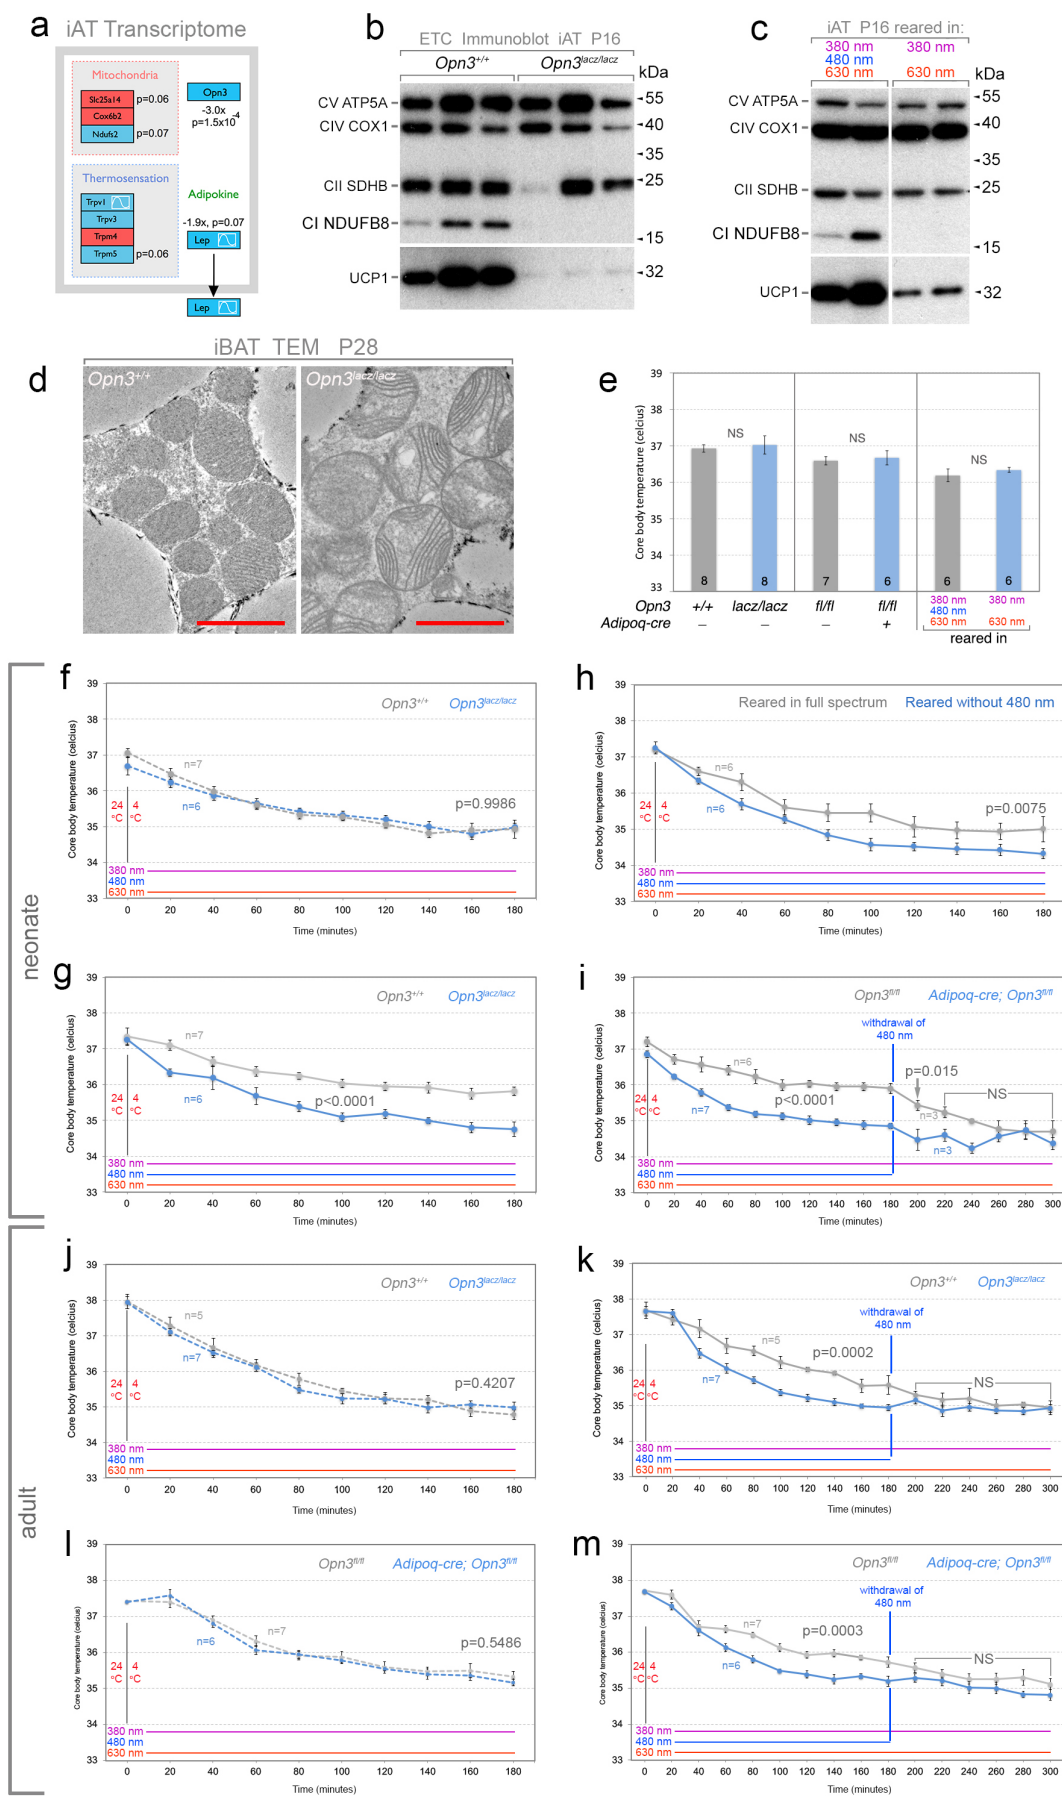



537 **Figure 6. Adipose *Opn3* is required for a normal response to cold stress.**

538 (a) Schematic of clustered *Opn3*-dependent transcript changes in iAT for the electron transport  
539 chain, as well as the Trp family receptors and Leptin. Red and blue colour coding indicates up-  
540 and down-regulated transcripts, respectively. The sine-wave symbol indicates that, according to  
541 data within CircaDB, expression of this transcript is diurnally rhythmic in this tissue type. (b, c)  
542 Immunoblots detecting multiple components of the electron transport chain (ATP5A, COX1,  
543 SDHB, NDUFB8, UCP1) in P16 iAT for *Opn3*<sup>+/+</sup> and *Opn3*<sup>lacz/lacz</sup> (b) and "minus blue" reared  
544 mice. NDUFB8 and UCP1 are consistently at lower levels in *Opn3* null and "minus blue" reared  
545 mice. (d) TEM showing abnormal mitochondrial morphology in the *Opn3* null iBAT at P28. Red  
546 scale bar is 2  $\mu$ m. (e) Core body temperature under ambient conditions of P21 mice that were  
547 *Opn3*<sup>+/+</sup> and *Opn3*<sup>lacz/lacz</sup> (left chart), *Opn3*<sup>fl/fl</sup> and *Adipoq-cre; Opn3*<sup>fl/fl</sup> (middle chart) or reared in  
548 "minus blue" lighting (right chart). Sample size (n) indicated at base of histogram bar.  
549 Significance calculated using Student's T-test. These measurements were taken 20 minutes  
550 before the initiation of the cold stress experiments shown in (f-i). (f-i) Core body temperature  
551 assessments over a time course after a 4°C cold challenge for P21-P24 neonatal mice of the  
552 indicated genotypes. The lighting conditions used during the cold stress experiments are  
553 indicated by the coloured lines above the chart horizontal axis. (f, g) Core body temperature  
554 during cold stress in *Opn3*<sup>lacz/lacz</sup> and control *Opn3*<sup>+/+</sup> in either full spectrum (g, 380 nm + 480 nm  
555 + 630 nm) or "minus blue" (f, 380 nm + 630 nm) lighting. These charts show the same cohort of  
556 mice. Both *Opn3*<sup>lacz/lacz</sup> mice and *Opn3*<sup>+/+</sup> mice in "minus blue" show a reduced ability to defend  
557 their body temperature. (h) Core body temperature of C57BL/6J mice that were raised from birth  
558 either in full spectrum lighting or in the "minus blue" condition. The cold stress experiment was  
559 carried out in "full spectrum" light. Mice raised without 480 nm light phenocopy the reduced  
560 ability of the *Opn3* null mice to defend their body temperature. (i) As for (g) except the  
561 genotypes are *Adipoq-cre; Opn3*<sup>fl/fl</sup> and control *Opn3*<sup>fl/fl</sup>. Also, at minute 180, for one cohort of  
562 n=3 *Opn3*<sup>fl/fl</sup> and n=3 *Adipoq-cre; Opn3*<sup>fl/fl</sup> mice, 480 nm light was withdrawn. This resulted in an  
563 acute reduction of core body temperature in control mice to that observed in the conditional null.  
564 (j, l) As for (f) except adult mice that were *Opn3*<sup>lacz/lacz</sup> and *Opn3*<sup>+/+</sup> (j) or *Adipoq-cre; Opn3*<sup>fl/fl</sup> and  
565 *Opn3*<sup>fl/fl</sup> (l). (k, m) As in (i) except adult *Opn3*<sup>lacz/lacz</sup> and *Opn3*<sup>+/+</sup> (k) or *Adipoq-cre; Opn3*<sup>fl/fl</sup> and  
566 *Opn3*<sup>fl/fl</sup> (m) mice. Sample size (n) labelled on chart. For (f-m), p-values according to ANOVA.  
567  
568

569  
570  
571  
572

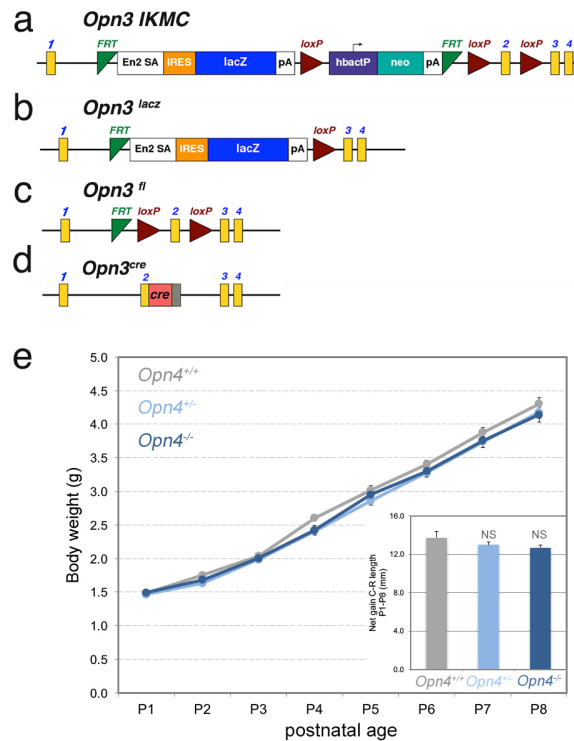

573  
574  
575  
576  
577  
578  
579  
580  
581  
582  
583  
584  
585  
586  
587  
588

**Figure S1. *Opn3* alleles and *Opn4* null neonatal growth**

(a-d) Schematics of the *Opn3* alleles used in this study. (a) The *Opn3* allele as targeted in ES cells by the International Knockout Mouse Consortium. Exons are numbered yellow boxes. *FRT*, FLP recombinase site-specific recombination sites. En2 SA, *Engrailed 2* splice acceptor. IRES, internal ribosome entry sequence. *LacZ*,  $\beta$ -galactosidase open reading frame. pA, polyadenylation signal. loxP, cre recombinase site specific recombination sequences. hbactP, human  $\beta$ -actin promoter. Right-facing arrow indicates the start point of transcription for hbactP. neo, the neomycin resistance gene. (b) The *Opn3*<sup>*lacz*</sup> allele generated after germ-line recombination at the loxP sites. (c) the *Opn3*<sup>*fl*</sup> allele generated after germ-line recombination at the *FRT* sites. The *Opn3*<sup>*cre*</sup> allele was generated by inserting the cre recombinase open reading frame into exon 2 using CRISPR/Cas9. (e) Body weight and crown-to rump length (inset) for *Opn4*<sup>+/+</sup> (grey, n=6), *Opn4*<sup>+/-</sup> (light blue, n=23) and *Opn4*<sup>-/-</sup> (dark blue, n=10) mice over the P1 to P8 time-course. According to ANOVA, no statistical differences between genotypes were identified.



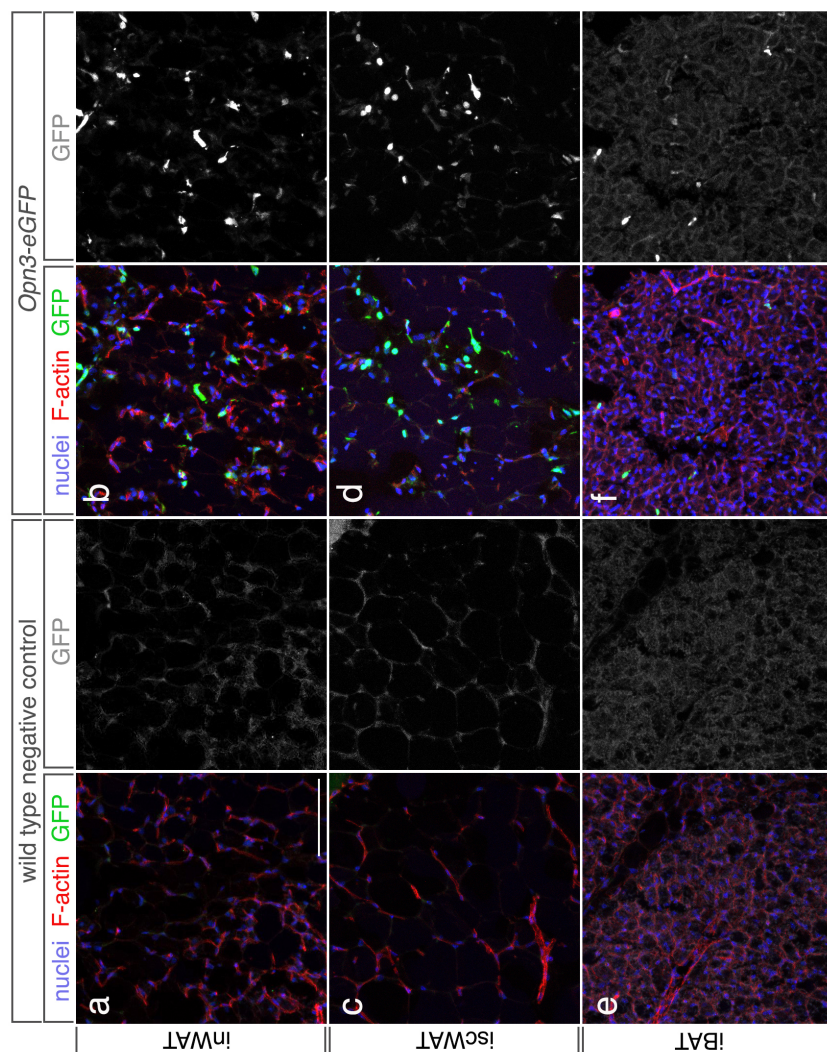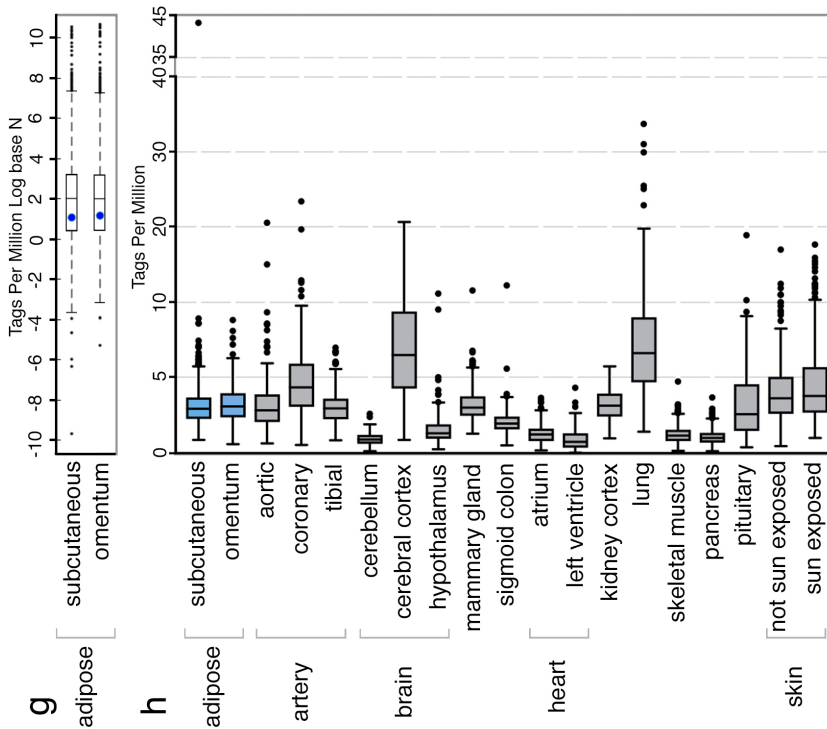

590  
591  
592  
593  
594  
595  
596  
597  
598  
599  
600  
601  
602  
603  
604  
605  
606  
607  
608  
609  
610  
611

**Figure S2. Expression of *Opn3-eGFP* reporter in adipose tissue.**

(a-f) Panels show cryosections of adipose tissue from P16 mice labeled with Hoechst33258 to detect nuclei (blue), with fluorochrome-conjugated Phalloidin to detect F-actin (red), and with anti-GFP antibodies (green, gray). (a, b) Inguinal white adipose tissue (inWAT), (c, d) interscapular white adipose tissue (iscWAT), (e, f) interscapular brown adipose tissue (iBAT). For clarity, the green channel detecting GFP is shown in grayscale. White, 100  $\mu$ m scale bar in (a) applies to all immunofluorescence panels. (g) Box and whiskers plot showing Tags Per Million (TPM)(Log base N) sequencing reads for the *OPN3* transcript (blue dot) versus all other transcripts in human subcutaneous and omental adipose tissue. The box defines the interquartile data range (IQR, the difference between the 25<sup>th</sup> and 75<sup>th</sup> percentiles), and the line within the box, the median. Box plot whiskers are plotted according to the Tukey method. The *OPN3* transcript is detected at 2.9 TPM for subcutaneous adipose and 3.1 TPM for omental adipose. The median value for all transcripts in these adipose tissues is 7.6 TPM for subcutaneous and 7.0 for omental. (h) Box and whiskers plot showing Tags Per Million sequencing reads for human *OPN3* transcript in the indicated tissues. Subcutaneous and omental adipose tissue median *OPN3* expression is in the mid-range of expression values.

612

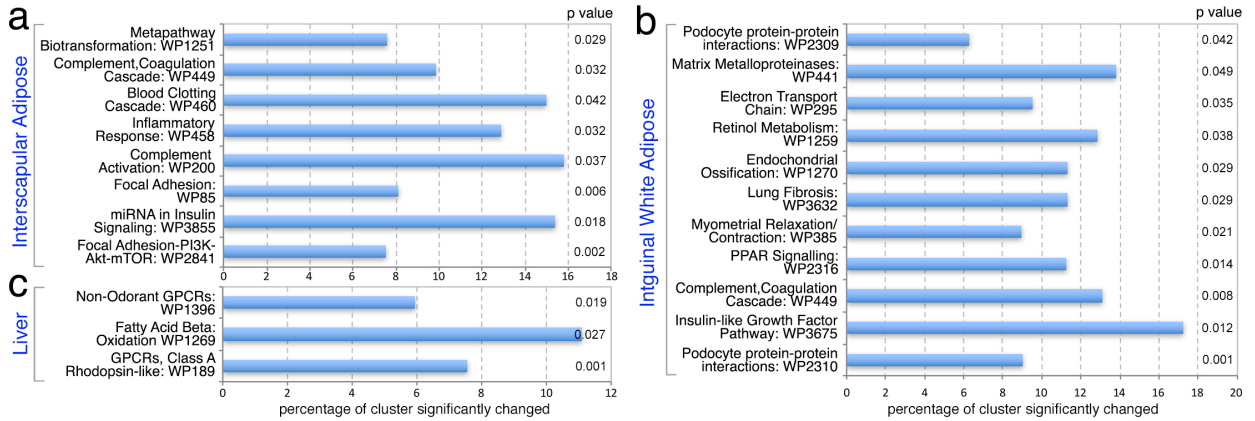

**d Interscapular adipose Tissue**  
ECM and growth factor signaling

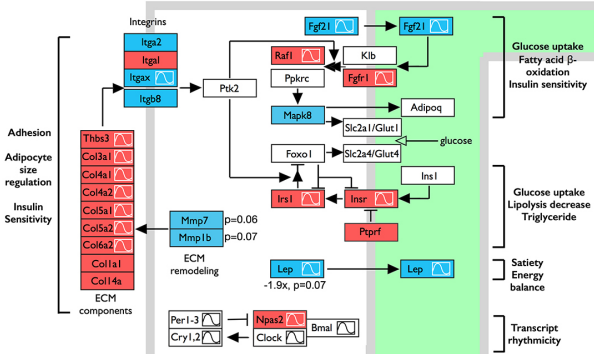

**h Liver**  
Fatty Acid  $\beta$ -Oxidation

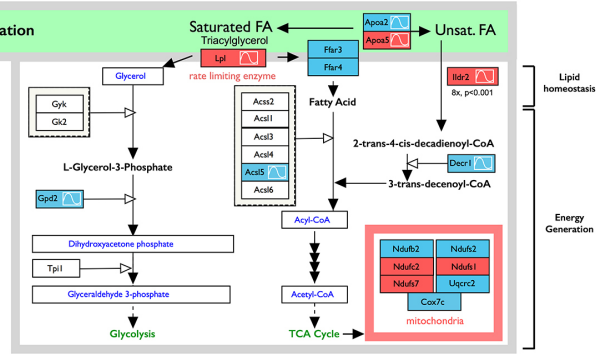

**e Inguinal white adipose tissue**  
ECM and growth factor/mTOR signaling

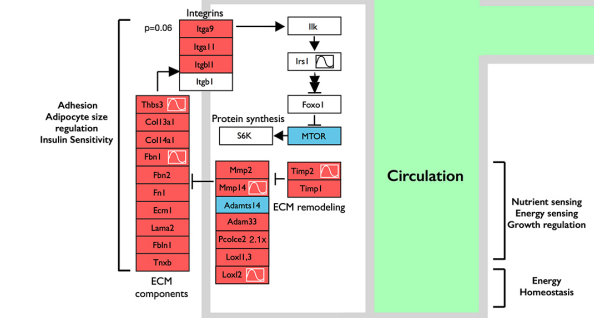

**f Inguinal white adipose tissue**  
PPAR Pathway, Fatty Acid Uptake

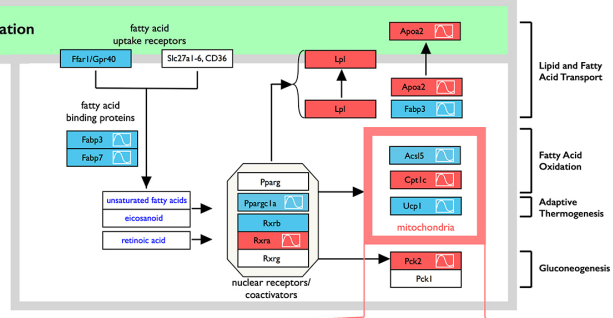

**g Electron transport chain**

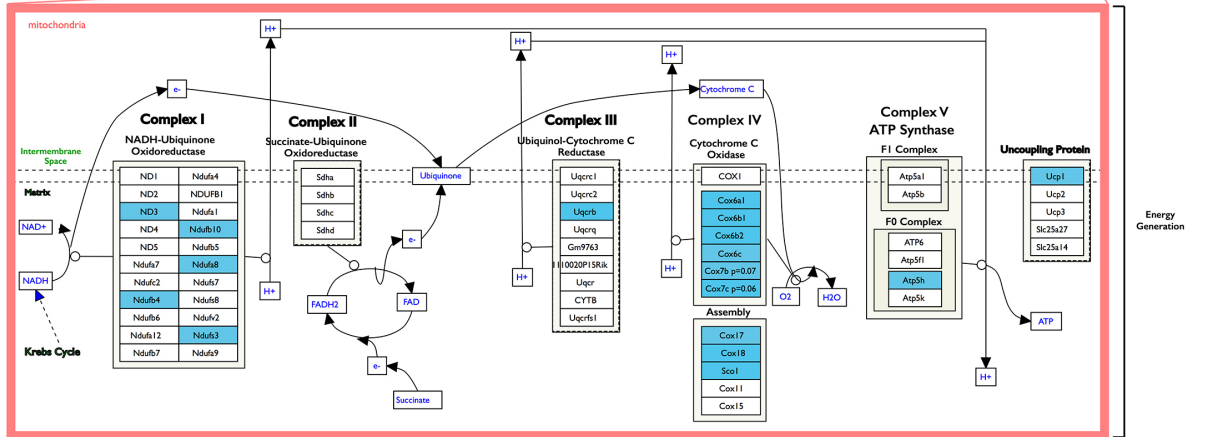

613 **Figure S3. Transcriptome analysis of *Opn3* null mice**

614 (a-c) Charts show, for interscapular adipose tissue (a), inguinal white adipose tissue (b) and  
615 liver (c), the WikiPathways (text labels and WP numbers) in which there was significant  
616 clustering (according to Z-score) of significantly changed transcripts in *Opn3*<sup>+/-</sup> versus  
617 *Opn3*<sup>lacz/lacz</sup> tissue. The chart horizontal axis shows the percentage of significantly changed  
618 transcripts for a given pathway. Fisher's exact test p-values are listed on the right of the chart.  
619 (d-h) Panels show schematically, in the context of known pathways, *Opn3*-dependent changes  
620 in transcripts for the indicated genes in iAT (d) inWAT (e-g) and liver (h). Each box represents a  
621 transcript that is significantly ( $p < 0.05$ ) up-regulated (red) or down-regulated (blue) in the *Opn3*  
622 null. For four transcripts (*Mmp7*, *Mmp1b*, *Lep* (d) and *Itga9* (e)) where the p-value did not quite  
623 reach  $p < 0.05$ , the p-value is listed. The sine-wave symbol indicates that, according to data  
624 within CircaDB, expression of this transcript is diurnally rhythmic in this tissue type. The  
625 circulation is modelled by the green area. All panels are modified versions of Wikipathway  
626 schematics for Focal Adhesion-PI3K-mTOR Signaling pathway (WP2841, (d, e)), for the PPAR  
627 Signaling Pathway (WP2316, (f)), for the Electron Transport Chain (WP295, (g)) and for the  
628 Fatty Acid  $\beta$ -Oxidation Pathway (WP1269, (h)).  
629

630

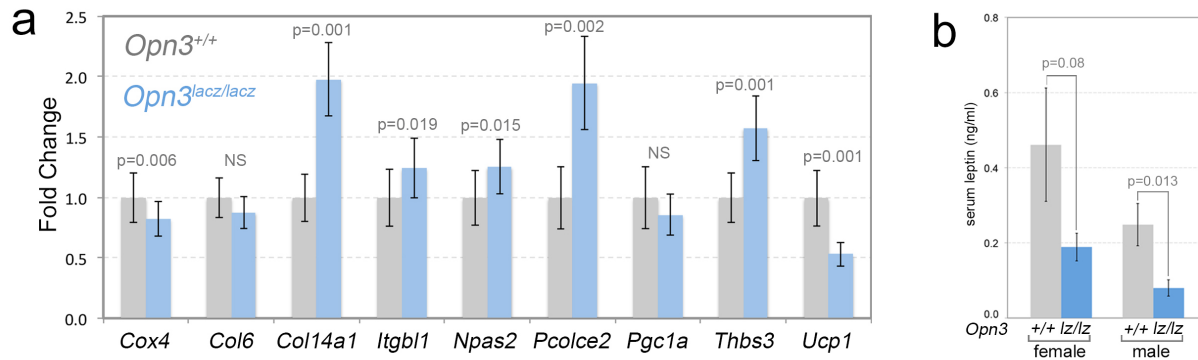

631  
632 **Figure S4. Transcriptome validation and Leptin in *Opn3* null mice.** (a) qPCR assessment of  
633 relative expression levels for the indicated transcripts in inWAT of P16 *Opn3*<sup>+/+</sup> and *Opn3*<sup>lacz/lacz</sup>  
634 mice. n=3 for each genotype. (b) Chart showing serum leptin levels in adult female (control,  
635 n=8, *Opn3*<sup>lacz/lacz</sup>, n=8) and male (control, n=7, *Opn3*<sup>lacz/lacz</sup>, n=8) mice. p-values calculated using  
636 Student's T-test.

637

638



## 639 **Materials and Methods**

640

### 641 **Mice**

642 Animals were housed in a pathogen-free vivarium in accordance with institutional policies.  
643 Genetically modified mice used in this study were: *B6;FVB-Tg(Adipoq-cre)1Evdr/J<sup>1</sup>* (Jax stock  
644 #010803), *Ai14<sup>2</sup>* (Jax stock #007914), *Opn4<sup>3</sup>*, *Tg(Opn3-EGFP)JY3Gsat* (MMRRC stock number  
645 030727-UCD) and *Opn3<sup>tm2a(EUCOMM)Wtsi</sup>* mice that were generated from C57BL/6N ES cells  
646 obtained from EUCOMM (ES clone ID: EPD0197\_3\_E01). The ES cells harbour a genetic  
647 modification wherein the lacz-Neomycin cassette is flanked by FRT sites and a *loxP* site  
648 separates lacz from the neomycin coding region. *LoxP* sites also flank exon2 of *Opn3* allowing  
649 multiple mouse lines that can serve as reporter nulls, conditional floxed and null mice. The  
650 *Opn3<sup>LacZ</sup>* reporter-null line was created by crossing *Opn3<sup>tm2a(EUCOMM)Wtsi</sup>* mice to *FVB/N-*  
651 *Tg(EIIa-cre)C5379Lmgd/J mice<sup>4</sup>* (Jax stock #003314). *Opn3<sup>fl/fl</sup>* line was created by crossing  
652 the *Opn3<sup>tm2a(EUCOMM)Wtsi</sup>* mice to *129S4/SvJaeSor-Gt(ROSA)26Sor<sup>tm1(FLP1)Dym/J<sup>5</sup></sup>* (Jax stock  
653 #003946) to remove the *lacZ* cassette. This means that *Opn3<sup>LacZ</sup>* mice are of mixed C57Bl6/6N,  
654 FVB/N background and that *Adipoq-cre; Opn3<sup>fl/fl</sup>* mice are of mixed C57Bl6/6N, 129S4/Sv,  
655 B6;FVB background. Littermate control animals were used for all experiments with the  
656 exception of C57BL/6J mice reared under different lighting conditions.

657 The *Opn3<sup>cre</sup>* was generated in-house using CRISPR-Cas9 technology. Four gRNAs that  
658 target exon 2 of *Opn3* were selected to knock in the Cre cassette. Plasmids containing the  
659 gRNA sequence were transfected into MK4 cells (an in-house mouse cell line representing  
660 induced metanephric mesenchyme undergoing epithelial conversion). The editing efficiency of  
661 gRNA was determined by T7E1 assay of PCR products of the target region amplified from  
662 genomic DNA of transfected MK4 cells. The sequence of the gRNA that was subsequently used  
663 for the transfection is TACCGTGGACTGGAGATCCA. Sanger sequencing was performed to  
664 validate the knock-in sequence of founder mice.

665 Mice were placed on normal chow diet (NCD: 29% Protein, 13% Fat and 58%  
666 Carbohydrate kcal; LAB Diet #5010) ad libitum with free access to water. Serum for leptin was  
667 collected by tail bleed after a 6 hour daytime food withdrawal at age 16 weeks.

668

### 669 **Genotyping**

670 Primer sequences for genotyping the *Opn3<sup>fl/fl</sup>* and *Opn3<sup>LacZ</sup>* alleles are:

671 F1: ACCCAGGCTTCTTTTGGTCT; R1: AGAGTCGTTGGC ATCCTTGG; F2:  
672 ACTATCCCGACCGCCTTACT; R2: GAACTGATGGCGAGCTCAGA

673 F1-R1 gives a 1191 bp wild-type band; F1-R1 gives a 1231 bp band from the *Opn3<sup>fl/fl</sup>* allele. F2-  
674 R2 gives a 701 bp band from the *Opn3<sup>LacZ</sup>* reporter null allele. Primer sequences for genotyping  
675 the *Opn3<sup>cre</sup>* allele are: Opn3creF1: TGCTGGCCTATGAACGTTATATCC;  
676 Opn3creR2: CACTCGTTGCATCGACCGGTAATGC. These give a 390 bp band.

677

### 678 **Lighting conditions**

679 Animals were housed in standard fluorescent lighting (photon flux  $1.62 \times 10^{15}$  photons/cm<sup>2</sup>/sec)  
680 on a 12L:12D cycle except where noted. For full spectrum lighting, LEDs were used to yield a  
681 comparable total photon flux of  $1.68 \times 10^{15}$  photons/cm<sup>2</sup>/sec. Spectral and photon flux information  
682 for LED lighting: near-violet ( $\lambda_{\max}=380$  nm,  $4.23 \times 10^{14}$  photons/cm<sup>2</sup>/sec in 370-400 nm range),  
683 blue ( $\lambda_{\max}=480$  nm,  $5.36 \times 10^{15}$  photons/cm<sup>2</sup>/sec in 430-530 nm range), green ( $\lambda_{\max}=530$  nm,  
684  $5.82 \times 10^{15}$  photons/cm<sup>2</sup>/sec in 480-600 nm range) and red ( $\lambda_{\max}=630$  nm,  $1.93 \times 10^{15}$

685 photons/cm<sup>2</sup>/sec in 590-660 nm range). For wavelength restricted growth assessment,  
686 C57BL/6J animals were housed in 12L:12D cycle starting late gestation (embryonic day E16)  
687 either with blue (480 nm and 380nm LEDs) or without blue (380 nm LEDs) lighting.  
688

689 **Measurement of bioluminescence from tissues of *Per2<sup>Luciferase</sup>* mice.** *Per2::Luciferase* mice<sup>6</sup>  
690 were euthanized by CO<sub>2</sub> asphyxiation, and scapular and inguinal fat pads were quickly  
691 dissected and placed into cold Hank's Balanced Salt Solution (HBSS, Gibco). WAT was  
692 dissected as ~3 mm pieces and cultured on cell culture inserts (Millipore PICMORG50) in 35  
693 mm diameter dishes in DMEM containing B27 serum-free supplement (Life Technologies),  
694 352.5 µg/ml sodium bicarbonate (Life Technologies), 10 mM HEPES (Life Technologies), 25  
695 units/ml penicillin, 25 µg/ml streptomycin (Life Technologies), 10 µM 9-*cis*-retinaldehyde  
696 (Sigma-Aldrich), and 100 µM luciferin potassium salt (Biosynth). Dishes were sealed with sterile  
697 vacuum grease and placed in a Lumicycle photomultiplier tube (PMT) system (Actimetrics). All  
698 tissue was maintained at 36°C. Bioluminescence data was measured and exported as raw  
699 counts (counts/second) by Lumicycle Analysis software (Actimetrics). For determination of  
700 peak/trough amplitude, raw counts were normalized to the lowest count for each trace from  
701 individual tissues. The trough value was compared to the peak value of luminescence between  
702 1.5 and 2.5 days after culture.

703 For photoentrainment of tissues, tissues were dissected as described above but then  
704 placed into 24-hour clock motorized photoentrainment devices for 5 days<sup>7</sup>. Pairs of tissues  
705 experienced 5 days of anti-phasic 9h:15h light:dark cycles, and tissues were then transferred, in  
706 darkness, to a Lumicycle PMT system. The light for light:dark cycles was produced by 417-nm,  
707 475-nm, and 530-nm LEDs for a combined output of 4W/m<sup>2</sup>. Bioluminescence traces were  
708 analysed for period and phase measurements by the sine wave best-fitted to at least 3 days of  
709 oscillations using Lumicycle Analysis software.  
710

### 711 **Immunohistochemistry and tissue processing**

712 Animals were anesthetized under isoflurane and sacrificed by cervical dislocation. Adipose  
713 tissue depots (interscapular adipose tissue complex and inguinal WAT) were harvested and  
714 fixed in ice cold 10 % zinc formalin for 1 hour at 4°C. After washing in PBS, adipose tissue  
715 samples were prepared for cryosectioning as described previously<sup>8</sup>. Gelatin-embedded tissues  
716 were sectioned at 16 µm in a cryostat and labelled with primary antibodies as previously  
717 described<sup>8</sup>. Rabbit antibodies to GFP (ab13970, 1 in 500), Collagen VI (COL6, ab6588, 1 in  
718 500), COX4 (Genetex, GTX114330, 1 in 400, cold acetone:methanol, 1:1, post-fixed, 10 min),  
719 and UCP1 (ab10983, 1 in 500), were purchased from Abcam. Alexa 647 conjugated isolectin (1  
720 in 300) and Alexa 546 conjugated F-actin were purchased from Invitrogen. Alexa 488  
721 conjugated secondary antibodies (1 in 300) were purchased from Jackson ImmunoResearch.  
722

### 723 **X-Gal staining**

724 For X-Gal labelling, tissue samples were fixed in X-Gal fixative (1% formaldehyde, 0.2%  
725 glutaraldehyde, 2 mM MgCl<sub>2</sub>, 5 mM EGTA, and 0.01% Nonidet P-40) for two hours at room  
726 temperature. Tissues were cryosectioned as described above and then labelled with X-Gal. The  
727 reaction was monitored closely and stopped when background started to appear in control (wild-  
728 type) tissues. Following two washes in PBS, cryosections were imaged using a bright field  
729 microscope.  
730

731 **Hemotoxylin labelling and cell-size quantification**

732 Gelatin-embedded frozen sections of inguinal WAT (as described above) were stained with  
733 hematoxylin and imaged under bright-field. Samples were imaged with a rhodamine filter to  
734 assess adipocyte size distribution. Using the free hand selection tool on ImageJ, adipocytes  
735 were outlined and the area measured in  $\mu\text{m}^2$ . Cell size distribution was determined by  
736 quantifying 60 cells from at least 10 regions, for a total of approximately 600 cells per animal.  
737 Cell areas were binned into 200  $\mu\text{m}^2$  intervals and the frequency of total cells (%) charted for  
738 each interval.

739

740 **Western Blotting**

741 Western blots were performed using standard protocols. Adipose tissue lysates were made in  
742 NP40 lysis buffer: 150 mM NaCl, 1% NP40, 50 mM Tris 8.0 with phosphatase inhibitors.  
743 Lysates were prepared by sonication and the lysates were separated from overlaying fat layer  
744 by three rounds of centrifugation. After BCA method of protein quantification, lysates were  
745 boiled in Laemmli sample buffer (4% SDS, 20% glycerol, 10% 2-mercaptoethanol, 0.004%  
746 bromophenol blue and 0.125 M Tris HCl, pH 6.8). Blots were incubated with OxPhos antibodies  
747 (ThermoFisher 45-8099 1:1000) and UCP-1 (Abcam ab10983). HRP-conjugated secondary  
748 antibodies were used at 1:5000 dilution and detected by enhanced chemiluminescence  
749 (ThermoFisher Scientific).

750

751 **Microarray analysis**

752 Interscapular adipose tissue complex and inguinal white adipose tissue from P16 mice were  
753 harvested at one hour after lights on (ZT1) and snap frozen on dry ice. Tissue pieces were  
754 homogenized in TRIzol (TriReagent Invitrogen) using RNase-free Zirconium oxide beads (2.0  
755 mm) in a TissueLyser II (Qiagen). Phase separation was achieved using chloroform and RNA in  
756 the aqueous phase was precipitated using ethanol. RNA was purified by column method using  
757 GeneJET RNA purification kit (ThermoFisher Scientific #K0732) and eluted into RNase-free  
758 water. RNA quality was assessed using the Agilent 2100 Bioanalyzer and an RNA-integrity  
759 number cut-off of 7 was applied for selecting samples for microarray assay. RNA from biological  
760 triplicates were submitted for microarray assay (ClariomD, Affymetrix) to the Technology Center  
761 for Genomics and Bioinformatics, University of California, Los Angeles.

762 Data analysis including normalization, gene expression changes and gene-enrichment  
763 analysis was performed using AltAnalyze, developed by Nathan Salomonis at Cincinnati  
764 Children's Hospital Medical Center. AltAnalyze uses the robust multi-array average method of  
765 normalization. Briefly, the raw intensity values are background corrected, log<sub>2</sub> transformed and  
766 then quantile normalized. Next, a linear model is fit to the normalized data to obtain an  
767 expression measure for each probe set on each array. Gene expression changes greater than  
768 1.1 fold were calculated using unpaired t-test, where a p-value <0.05 was used as a cut-off.

769

770 **Quantitative RT-PCR**

771 Inguinal adipose depot was harvested at indicated times of day (ZT1, one hour after lights ON  
772 and ZT17, 5 hours after lights OFF) from P16 mouse pups. Samples at ZT17 were harvested  
773 under dim red light. Snap frozen tissue was homogenized and processed for RNA as described  
774 above. RNA was treated with RNase-free DNase I (ThermoFisher Scientific #EN0521) and  
775 cDNA was synthesized using Verso cDNA synthesis kit (ThermoFisher Scientific AB1453/B).  
776 Quantitative RT-PCR was performed with Radiant™ SYBR Green Lo-ROX qPCR mix (Alkali

777 Scientific Inc.) in a ThermoFisher QuantStudio 6 Flex Real-Time PCR system. Primer  
 778 information for quantitative PCR is included in the Table. Relative expression software tool  
 779 (REST<sup>®</sup>)<sup>9</sup> was used for statistical analysis (fixed pair-wise randomization reallocation test) of  
 780 qPCR results using three normalizing genes (*Hprt*, *Rplp0*, *Hmbs*).  
 781

| Target         | Forward primer             | Reverse primer             |
|----------------|----------------------------|----------------------------|
| <i>Per1</i>    | GCTCGAACGGCCAGGTGTCGT      | ACAACGGGGCTTTTGGAGTCTGGAT  |
| <i>Per2</i>    | GAAGACGTGGACATGAGCAGTGGC   | CATCATCAGGGCTGGGGTGAGTGTT  |
| <i>Per3</i>    | CACTTTGTGCGACCTGCTTGC      | ATGAACCAAATAGGGGAGGAT      |
| <i>Bmal1</i>   | TGACCCTCATGGAAGGTTAGAA     | GGACATTGCATTGCATGTTGG      |
| <i>Npas2</i>   | GCAGTGAAGGAAAAGGACTCAAGCC  | TGTGTGTGAGGACTTGTGGGAACCTC |
| <i>Nr1d1</i>   | AAAAGTGTCCATCGTTCGCATCAA   | GCCCCAAAACGCACAGCATCTCTA   |
| <i>Nr1d2</i>   | TGAACGCAGGAGGTGTGATTG      | GAGGACTGGAAGCTATTCTCAGA    |
| <i>Rora</i>    | GTCACGAAGAAGACACACACATCTCA | CAGCCTTCACACGTAATGACACCAT  |
| <i>Cox4</i>    | CAATGAATGGAAGACAGTTGTGG    | GATCGAAAGTATGAGGGATGGG     |
| <i>Cox6</i>    | ACTTGGATGTTGGGTGTTCA       | GCGATTCATGGTCTTCACAC       |
| <i>Col14a1</i> | TGGAGTATTGGGAGGTTCAACT     | TGCCACTCTATTCTGGGGTCC      |
| <i>Itgbl1</i>  | TGGGAAGTGTACTGTGGAAC       | GTCCCCAGTTGGATCAACATC      |
| <i>Pcolce2</i> | TGTGGCGGCATTCTTACCG        | CCCTCAGGAACTGTGATTTTCCA    |
| <i>Pgc1a</i>   | TATGGAGTGACATAGAGTGTGCT    | CCACTTCAATCCACCCAGAAAG     |
| <i>Thbs3</i>   | ATGGAGAAGCCGGAACCTTTGG     | AGTGAGTAAAGCTGTCCGAATCT    |
| <i>Ucp-1</i>   | AGGCTTCCAGTACCATTAGGT      | CTGAGTGAGGCAAAGCTGATTT     |
| <i>Hprt1</i>   | TCAGTCAACGGGGGACATAAA      | GGGGCTGTACTGCTTAACCAG      |
| <i>Hmbs</i>    | GACCTGGTCGTTCACTCCC        | GACAACAGCATCACAAGGGTT      |
| <i>Rplp0</i>   | AGATTCCGGGATATGCTGTTGGC    | TCCGGTCCTAGACCAGTGTTTC     |

782

### 783 **Transmission Electron Microscopy**

784 Freshly dissected adipose tissues were collected and 1 mm samples from approximately similar  
 785 areas were fixed in 2% glutaraldehyde, 1% paraformaldehyde in PBS for 1 hour at room  
 786 temperature before processing and sectioning for transmission electron microscopy as  
 787 described before<sup>10</sup>.

788

### 789 **NAD/NADH Quantification**

790 NAD levels were measured using NAD/NADH assay kit from Abcam (ab65348). Briefly, tissues  
 791 samples (inguinal adipose tissue and liver) from P16 mouse pups were snap frozen in liquid  
 792 nitrogen, homogenized in NADH/NAD extraction buffer and filtered through a 10kD spin column  
 793 (ab93349) to remove enzymes. Assay procedure was followed per kit instructions and levels of  
 794 NADH and NAD<sup>+</sup> were determined normalized to tissue weight.

795

### 796 **Thermoregulation assay**

797 Acute cold temperature challenge was performed on control and experimental mice from *Opn3*  
 798 reporter null (*Opn3*<sup>+/+</sup> and *Opn3*<sup>lacz/lacz</sup>) and adipose tissue conditional deletion of *Opn3* (*Opn3*<sup>fl/fl</sup>  
 799 and *Adipoqcre*; *Opn3*<sup>fl/fl</sup>) mouse lines. In addition, C57BL/6J mice reared under wavelength  
 800 restriction (with or without blue, as described previously) were subjected to this assay.  
 801 Littermates housed with mother were separated from their home cage and individually housed



802 in a home-built lighting chamber situated in an electronically monitored 4°C cold room. While the  
803 mouse was conscious, body temperature was measured rectally with a RET-3 Microprobe  
804 Thermometer (Kent Scientific) every 20 minutes for the duration of the assay. Food and water  
805 were available *ad libitum*. The thermo probe operator was blinded to mouse genotype and prior  
806 temperature measurements throughout the study. At the end of the 3-hour cold stress, the mice  
807 were returned to their home cage. For the 3-hour cold challenge at postnatal day 21, mice were  
808 subjected to near-violet (380 nm) and red (630 nm) wavelengths in the light chamber. A second  
809 3-hour cold challenge was conducted at postnatal day 24 where the mice were subjected to  
810 near-violet (380 nm), blue (480 nm) and red (630 nm) wavelengths. The exception being Fig 6g,  
811 where the study was extended by 2 hours following withdrawal of 480 nm wavelength. The  
812 order of cage placement was randomized at this time, such that the thermo probe operator  
813 remained blinded.

814

### 815 **Data analysis**

816 Statistical analyses were performed using GraphPad Prism version 4.00 (GraphPad Software),  
817 Microsoft Excel and Sigma plot (Figure 3). Growth charts were analysed by two-way ANOVA  
818 followed by *t*-test for comparison at each time-point. Two-tailed distribution, two-sample unequal  
819 variance *t*-test was used to determine the statistical significance between two independent  
820 groups.

821

822

### 823 **References**

824

- 825 1. Eguchi, J. *et al.* Transcriptional control of adipose lipid handling by IRF4. *Cell Metab.* **13**,  
826 249–259 (2011).
- 827 2. Madisen, L. *et al.* A robust and high-throughput Cre reporting and characterization  
828 system for the whole mouse brain. *Nat Neurosci* **13**, 133–140 (2010).
- 829 3. Panda, S. *et al.* Melanopsin is required for non-image-forming photic responses in blind  
830 mice. *Science (80-. )*. **301**, 525–527 (2003).
- 831 4. Lakso, M. *et al.* Efficient in vivo manipulation of mouse genomic sequences at the zygote  
832 stage. *Proc. Natl. Acad. Sci. U. S. A.* **93**, 5860–5 (1996).
- 833 5. Henrich, V. C. *et al.* Widespread recombinase expression using FLPeR (flipper) mice.  
834 *Genesis* **28**, 106–110 (2000).
- 835 6. Yoo, S. H. *et al.* PERIOD2::LUCIFERASE real-time reporting of circadian dynamics  
836 reveals persistent circadian oscillations in mouse peripheral tissues. *Proc Natl Acad Sci U*  
837 *S A* **101**, 5339–5346 (2004).
- 838 7. Buhr, E. D. & Van Gelder, R. N. Local photic entrainment of the retinal circadian oscillator  
839 in the absence of rods, cones, and melanopsin. *Proc Natl Acad Sci U S A* **111**, 8625–  
840 8630 (2014).
- 841 8. Berry, R. *et al.* Imaging of adipose tissue. *Methods Enzymol.* **537**, 47–73 (2014).
- 842 9. Pfaffl, M. W., Horgan, G. W. & Dempfle, L. Relative expression software tool (REST) for  
843 group-wise comparison and statistical analysis of relative expression results in real-time  
844 PCR. *Nucleic Acids Res.* **30**, e36 (2002).
- 845 10. Cinti S, Zingaretti MC, Cancellato R, Ceresi E, F. P. Morphologic techniques for the study  
846 of brown adipose tissue and white adipose tissue. *Methods Mol. Biol.* **155**, 21–51 (2001).

847
